# Supplementary material for: An Empirical Study of the Relationship between General Self-efficacy, Chinese Character Learning Anxiety, and Learning Burnout among International Students in China
Source: Research Square preprint supplement (doi:10.21203/rs.3.rs-4377571/v1), 2024-05-30
Supplement: Supplementary file 1 [file b76aa5a8e5b01b6c8611ad96.xlsx]

## Sheet: Sheet1
序号	LA1	LA2	LA3	LA4	LA5	CA1	CA2	CA3	CA4	CA5	CA6	TA1	TA2	TA3	TA4	NEA1	NEA2	NEA3	NEA4	NEA5	SE1	SE2	SE3	SE4	SE5	SE6	SE7	SE8	SE9	SE10	SE11	SE12	SE13	SE14	FD1	FD2	FD3	FD4	MI1	MI2	MI3	MI4	LSA1	LSA2	LSA3	LSA4
1	4	4	4	3	3	4	2	3	2	2	4	4	4	4	3	4	4	3	2	2	2	4	4	2	3	2	2	2	3	4	2	4	3	4	4	4	4	4	3	3	4	4	5	5	5	5
2	2	2	2	2	2	2	2	2	2	2	2	2	2	2	2	2	2	2	2	2	4	4	4	4	4	4	4	4	4	4	4	4	4	4	2	2	2	2	1	1	1	1	2	2	2	2
3	2	2	3	2	2	4	3	3	4	2	4	4	2	2	2	2	4	4	2	4	2	2	4	2	2	3	3	3	2	4	4	3	2	2	4	4	2	3	4	4	2	2	2	2	3	4
4	4	3	3	2	4	3	2	4	4	4	4	2	4	2	4	4	2	4	4	3	2	4	2	2	2	4	2	3	4	4	2	4	4	3	3	3	3	2	5	5	5	5	2	3	2	3
5	2	2	4	3	2	2	4	4	4	3	3	3	3	2	3	1	1	1	1	1	4	3	2	3	4	4	4	4	2	2	2	2	2	3	2	3	4	4	2	3	4	4	4	2	4	4
6	2	1	2	1	1	3	1	1	2	1	1	3	3	3	1	3	1	3	1	3	3	5	5	4	4	4	4	5	5	5	4	4	3	4	2	3	3	3	2	2	2	2	2	1	1	1
7	3	2	4	3	3	2	3	4	3	4	4	2	4	4	2	3	2	4	4	4	2	4	3	4	4	2	4	3	4	2	3	3	3	4	4	2	3	4	3	3	4	3	3	3	4	2
8	4	3	2	4	3	4	2	2	4	4	2	2	2	3	3	4	4	4	4	3	1	1	1	1	1	1	1	1	1	1	1	1	1	1	3	3	4	2	2	4	3	4	3	4	3	3
9	4	5	5	3	5	3	4	5	5	4	5	5	4	3	4	5	5	5	3	3	1	2	2	3	2	2	1	1	3	2	1	2	3	2	5	5	5	5	5	5	4	5	5	5	3	5
10	1	1	1	1	1	3	3	3	5	3	4	3	3	5	4	4	3	3	3	3	2	1	2	2	3	1	2	3	1	3	3	1	2	2	3	5	3	3	5	5	3	5	5	5	5	5
11	4	4	4	2	4	2	2	3	3	2	3	2	3	3	2	5	5	5	5	5	4	3	2	2	3	2	3	4	3	4	2	4	2	2	2	4	4	4	3	4	3	2	4	2	4	2
12	2	3	4	4	3	2	3	4	4	3	2	2	2	2	4	3	4	4	3	4	2	2	3	4	4	4	2	3	3	4	2	2	2	3	4	4	3	2	3	3	3	4	4	4	3	2
13	4	3	3	4	3	4	2	4	2	4	4	4	4	2	3	4	2	3	4	3	3	4	2	3	3	2	2	3	2	3	3	4	3	2	2	2	2	3	2	3	2	4	3	3	2	3
14	3	4	5	3	3	1	1	1	1	1	1	3	4	3	4	3	3	5	3	5	1	2	2	1	2	2	1	3	3	3	2	2	2	2	3	4	3	3	5	4	3	3	3	3	3	3
15	2	4	4	4	4	2	4	4	4	2	4	4	3	3	2	4	2	3	3	4	4	3	2	4	2	3	4	2	2	3	3	3	4	2	5	5	5	5	4	3	4	2	2	4	2	2
16	2	2	4	2	2	4	4	4	2	3	2	4	2	4	4	4	4	4	4	4	3	2	2	2	2	3	2	2	3	3	3	4	2	4	4	4	3	2	4	4	3	2	2	2	2	2
17	3	3	2	2	3	3	3	2	3	3	2	5	5	5	5	4	4	4	2	4	2	4	3	2	2	4	2	2	3	2	4	2	2	2	3	4	4	4	3	2	4	3	4	2	3	2
18	2	3	4	3	3	3	2	4	2	3	4	4	4	4	3	5	5	5	5	5	2	4	4	3	4	2	2	2	2	2	2	4	2	3	2	4	4	4	3	2	2	3	2	4	2	4
19	3	4	4	3	5	4	5	5	5	5	4	3	4	3	5	1	1	1	1	1	3	2	1	1	1	1	3	2	3	3	3	1	3	2	3	5	5	5	5	5	4	5	4	5	3	5
20	4	2	2	4	3	4	3	4	4	4	2	2	3	2	2	2	2	2	2	4	1	1	1	1	1	1	1	1	1	1	1	1	1	1	4	3	2	4	4	4	4	2	4	3	2	4
21	3	2	3	3	1	2	1	1	3	3	2	2	1	2	3	2	2	1	3	3	4	4	4	4	4	4	4	4	4	4	4	4	4	4	1	2	2	2	2	3	3	1	3	1	1	2
22	3	3	4	2	2	4	3	2	4	2	2	4	2	3	4	2	3	4	3	2	3	2	4	3	2	3	3	2	4	3	3	4	4	3	4	4	4	4	2	2	2	2	2	3	3	2
23	5	5	5	5	5	3	4	3	2	3	4	3	4	2	3	2	4	3	4	4	2	2	4	3	4	3	3	4	3	2	3	2	2	2	2	3	3	2	4	4	3	3	3	4	3	3
24	4	4	4	2	3	2	3	2	2	2	3	2	2	4	4	2	3	2	3	3	2	2	3	2	2	3	3	2	2	4	2	2	3	4	3	3	4	2	4	2	4	2	4	2	2	4
25	2	2	3	3	3	2	3	1	1	3	2	2	2	2	2	3	1	3	3	3	4	3	4	3	5	4	3	3	5	4	3	5	4	3	1	3	3	1	2	2	1	1	3	1	1	2
26	3	2	4	4	4	1	1	1	1	1	1	4	3	3	3	2	4	4	2	4	3	2	2	2	2	2	3	4	2	4	2	3	3	3	4	2	2	4	2	3	2	4	4	4	4	3
27	3	3	3	1	2	2	2	2	2	2	2	1	3	3	1	3	3	3	2	1	4	5	3	4	5	5	4	4	5	5	5	5	5	3	2	3	2	2	1	1	2	2	3	3	1	2
28	2	3	2	2	2	3	2	2	2	4	3	4	3	3	4	4	3	2	2	2	4	4	3	4	3	3	3	3	2	2	4	2	4	4	4	2	2	2	4	2	2	4	5	5	5	5
29	4	4	4	2	4	4	3	2	3	4	2	4	2	4	2	2	4	2	2	3	3	4	2	3	4	2	2	2	3	4	4	4	4	3	2	3	3	4	4	4	4	4	4	2	3	3
30	5	5	3	4	3	4	5	4	5	3	3	5	3	4	4	4	4	5	5	5	3	1	1	1	3	1	3	3	2	3	2	1	3	3	4	3	4	4	1	1	1	1	3	5	4	3
31	4	4	3	4	2	4	4	4	4	2	3	3	3	2	2	4	4	3	2	2	2	2	2	4	3	4	2	4	4	4	2	2	3	4	4	2	2	3	4	4	3	2	5	5	5	5
32	3	2	3	2	2	3	3	3	1	1	1	1	3	3	3	2	3	3	1	1	5	5	4	3	3	4	5	5	5	4	4	3	4	4	3	1	3	3	2	2	2	2	2	1	1	2
33	5	5	5	5	5	4	3	3	3	3	4	3	3	5	3	5	4	5	5	4	3	2	2	2	1	1	3	3	3	2	3	3	1	2	5	4	5	5	4	5	4	5	5	3	3	3
34	2	3	4	3	2	4	2	2	2	4	4	4	2	4	3	2	4	3	4	3	2	4	2	4	2	2	3	2	2	2	4	4	4	4	5	5	5	5	3	3	3	2	2	3	4	4
35	3	2	2	1	2	3	2	2	1	2	1	2	2	3	2	2	2	2	2	2	3	3	4	5	4	3	3	4	3	4	5	3	3	5	3	1	3	2	3	1	3	1	2	2	1	1
36	4	3	5	5	4	5	3	3	4	3	4	5	3	5	5	4	3	4	4	5	3	3	2	2	1	3	2	3	1	2	3	1	3	2	5	3	3	5	4	4	3	3	1	1	1	1
37	5	5	3	5	3	4	4	3	3	4	5	5	5	5	5	5	4	3	5	4	1	3	1	1	3	2	2	3	2	1	2	2	2	1	4	4	5	3	5	3	4	5	4	3	4	5
38	2	4	4	4	2	3	3	2	3	3	3	3	2	4	4	2	2	3	4	3	4	4	3	3	4	3	4	2	2	2	2	4	4	4	2	3	2	4	3	3	2	4	4	2	4	4
39	5	5	5	5	5	4	4	4	3	2	4	3	2	2	4	4	3	2	2	3	3	4	2	2	4	3	2	3	4	3	4	2	4	4	4	3	2	3	4	4	4	4	3	2	3	3
40	4	3	5	4	4	4	4	5	4	3	4	5	3	3	5	5	5	3	3	5	1	2	1	3	3	1	3	2	3	3	2	1	1	2	1	1	1	1	5	4	4	4	3	4	4	4
41	2	2	2	2	2	4	5	3	4	4	5	2	2	2	2	5	3	4	3	4	1	3	2	3	1	2	1	3	3	2	3	2	2	2	5	4	5	4	1	1	1	1	5	3	5	3
42	4	2	4	4	4	2	2	2	3	4	4	4	4	4	2	4	3	2	4	2	2	3	2	2	4	4	3	3	4	2	4	2	3	2	2	4	2	2	2	3	4	2	3	3	4	2
43	3	2	4	4	3	4	4	3	3	4	3	4	4	3	3	3	4	2	4	2	1	1	1	1	1	1	1	1	1	1	1	1	1	1	3	2	3	3	4	4	4	4	2	3	4	3
44	4	4	2	2	2	4	3	4	3	4	3	3	4	4	4	2	2	3	2	4	2	2	2	2	2	2	3	2	4	2	2	4	4	2	2	4	2	2	3	3	3	3	2	2	2	4
45	5	5	5	5	5	3	3	2	4	3	2	3	3	4	2	4	4	3	4	4	3	2	2	4	2	2	2	2	2	4	3	2	4	2	3	3	3	4	4	3	4	4	4	4	4	4
46	2	2	2	2	2	3	3	3	4	3	4	5	5	5	5	3	3	4	4	3	4	2	3	2	2	2	3	2	2	4	3	4	2	3	3	3	4	2	3	2	4	4	3	4	2	3
47	4	3	4	5	5	3	4	4	5	5	5	5	5	5	5	5	4	5	5	3	1	3	2	1	1	3	3	2	3	1	3	2	1	3	4	3	5	3	4	5	4	4	3	5	5	4
48	2	2	2	2	2	4	2	3	3	4	2	3	4	3	2	2	3	2	4	4	2	2	3	4	4	3	2	2	3	3	4	3	4	4	2	4	4	3	3	4	3	4	3	4	2	3
49	2	4	2	3	3	3	2	4	4	3	2	4	4	4	4	5	5	5	5	5	3	3	2	4	3	2	2	4	3	2	2	3	4	2	3	2	4	4	3	4	2	3	3	4	4	2
50	1	3	1	2	1	2	3	1	3	1	2	2	3	2	3	2	2	2	2	2	5	5	3	4	4	4	3	5	5	3	5	4	4	5	2	3	3	1	3	1	3	3	1	2	2	1
51	4	4	4	3	3	2	2	4	2	3	4	2	2	2	3	3	4	4	2	3	2	3	3	4	2	3	3	2	2	4	2	2	3	3	5	5	5	5	4	2	2	2	3	4	4	3
52	2	4	2	4	3	2	2	4	2	3	2	4	4	3	3	4	3	2	3	4	4	3	2	3	2	3	4	2	3	2	2	2	3	2	4	4	2	4	4	4	4	3	5	5	5	5
53	2	4	4	4	3	2	3	2	2	3	2	3	3	4	2	2	3	2	3	4	3	2	2	2	3	4	2	2	3	2	2	2	4	2	4	2	4	2	3	3	4	2	2	2	4	3
54	4	2	2	4	2	2	4	3	4	2	3	3	2	2	3	4	4	4	4	2	4	4	2	3	4	3	3	4	3	2	4	3	2	2	2	4	3	4	2	2	3	4	4	2	3	4
55	2	1	2	3	1	2	2	2	2	2	2	3	1	1	2	3	2	1	2	1	4	3	5	5	4	5	5	5	3	3	3	4	4	5	1	2	2	1	2	2	3	2	3	1	3	2
56	2	2	2	2	2	3	1	2	2	1	3	2	3	3	3	1	1	3	1	1	4	5	5	5	5	3	3	5	3	3	4	5	5	3	3	1	3	2	2	2	1	2	3	2	2	2
57	4	3	3	4	4	2	3	2	4	2	2	3	3	3	4	2	2	3	4	2	2	3	2	2	2	3	4	3	4	3	4	3	2	2	4	2	3	4	4	2	2	2	2	2	3	2
58	3	4	4	4	5	3	4	4	3	5	5	4	3	5	3	1	1	1	1	1	3	3	1	2	1	2	1	2	1	2	3	2	3	2	4	5	4	4	3	3	3	5	3	3	5	5
59	4	2	4	3	4	4	3	3	2	3	2	2	2	3	3	2	4	4	4	3	2	2	4	2	4	2	2	2	4	4	4	4	4	3	3	2	2	3	5	5	5	5	2	4	4	3
60	5	4	4	3	3	3	4	3	3	5	5	4	3	3	3	5	5	5	5	4	5	5	5	5	5	5	5	5	5	5	5	5	5	5	5	3	4	4	3	5	4	5	4	4	5	5
61	4	4	2	4	3	4	4	4	2	3	2	4	3	4	4	3	4	4	4	2	4	4	2	2	2	2	2	2	4	4	4	2	3	3	3	4	3	3	3	4	3	3	4	2	3	2
62	5	4	3	5	4	3	5	5	5	4	4	2	2	2	2	4	5	5	4	3	1	2	2	1	1	3	1	3	2	1	1	3	2	1	4	3	4	3	1	1	1	1	5	3	5	4
63	5	5	4	5	5	4	5	3	5	5	5	4	3	5	3	1	1	1	1	1	1	1	3	3	1	1	1	1	3	1	2	3	2	1	3	5	4	5	3	4	3	4	4	4	4	4
64	1	1	1	1	1	2	3	3	2	3	1	2	3	2	2	1	3	1	2	3	3	4	5	4	5	5	3	4	3	5	5	3	3	4	3	3	1	3	2	2	2	2	3	2	1	3
65	3	4	2	3	2	2	3	4	3	4	3	2	4	4	3	4	4	3	2	3	1	1	1	1	1	1	1	1	1	1	1	1	1	1	3	2	4	2	2	3	4	3	4	3	2	4
66	4	4	4	3	4	4	3	2	2	2	2	4	2	2	2	3	2	3	2	4	2	2	2	3	3	4	2	3	2	2	4	4	2	3	3	2	3	4	4	3	2	4	2	3	2	4
67	4	2	2	3	4	3	2	4	2	2	4	4	3	4	4	3	2	4	3	2	5	5	5	5	5	5	5	5	5	5	5	5	5	5	2	2	2	2	2	2	2	2	2	2	2	2
68	4	4	4	2	4	2	4	2	3	3	2	4	3	2	3	2	4	3	4	4	2	3	4	3	3	3	2	4	4	4	2	2	3	2	4	2	3	3	2	2	2	2	4	3	2	3
69	3	3	4	2	4	4	2	3	2	4	3	2	3	4	2	3	3	4	2	3	4	3	4	3	2	2	4	2	3	2	3	3	3	2	4	4	3	2	4	4	3	4	3	2	2	4
70	5	5	5	5	5	4	2	4	2	3	4	4	4	4	3	4	4	2	2	3	2	3	2	2	3	2	3	2	4	4	4	4	3	3	4	2	3	3	4	4	2	4	4	2	4	2
71	2	2	2	2	2	2	2	2	2	2	2	2	2	2	2	2	2	2	2	2	4	4	4	4	4	4	4	4	4	4	4	4	4	4	2	2	2	2	1	1	1	1	2	2	2	2
72	4	4	3	4	4	3	2	4	4	3	3	4	2	2	4	2	2	4	2	4	4	3	2	3	4	2	2	2	4	4	4	2	2	4	5	5	5	5	3	3	4	2	4	2	2	3
73	3	2	1	2	1	3	1	1	3	3	2	2	2	2	2	1	1	3	3	3	3	4	3	4	3	3	3	4	3	5	3	5	4	4	1	3	2	3	1	2	3	1	2	1	3	1
74	5	5	5	5	5	4	3	2	2	4	2	4	4	4	3	4	2	3	4	3	3	2	2	4	4	2	4	4	3	2	2	3	4	3	2	3	4	3	2	3	4	3	4	3	3	4
75	4	3	3	3	3	4	4	4	4	4	5	4	3	5	4	5	5	5	5	5	3	3	3	3	2	2	3	2	2	1	1	2	1	3	5	5	3	3	3	5	3	3	3	5	5	5
76	4	3	3	2	3	4	3	3	4	3	3	2	3	2	4	2	3	4	3	3	2	3	4	3	2	3	3	2	3	2	4	2	3	4	2	2	2	3	4	4	3	4	3	2	2	4
77	3	5	4	5	4	4	4	4	3	4	4	3	3	4	5	5	4	3	5	3	1	1	1	1	1	1	1	1	1	1	1	1	1	1	3	3	4	5	3	3	3	5	4	5	4	5
78	4	4	4	4	3	4	2	3	4	3	2	5	5	5	5	4	2	2	2	2	3	3	2	3	2	4	3	3	2	3	2	2	4	4	4	3	4	2	4	2	4	4	4	3	2	4
79	4	3	2	4	3	4	4	3	3	4	4	4	2	3	4	4	3	2	2	3	4	4	4	2	4	4	4	2	4	4	2	4	2	2	4	3	3	4	3	3	4	2	3	4	4	4
80	3	3	3	1	3	2	1	3	3	3	2	2	3	3	3	2	1	1	3	1	5	4	5	3	5	5	3	5	4	4	5	5	3	3	2	2	2	2	1	1	1	3	1	3	1	1
81	2	3	4	3	4	3	3	2	3	4	2	2	4	2	3	2	3	2	4	4	4	2	2	4	2	2	3	2	2	4	2	4	4	4	4	4	4	2	4	3	4	3	5	5	5	5
82	2	3	3	4	4	4	3	4	4	2	4	4	2	3	3	2	4	2	4	4	3	4	3	4	4	4	4	4	3	3	4	2	2	4	4	2	2	3	2	2	2	2	3	3	4	3
83	2	4	4	4	4	4	3	3	4	4	3	2	3	4	3	2	4	3	4	3	2	4	2	4	4	3	2	4	4	2	2	2	2	3	3	3	3	3	5	5	5	5	3	2	2	3
84	3	4	4	4	5	4	3	3	5	3	4	4	4	5	3	4	4	3	5	3	2	2	2	3	3	3	3	2	3	3	2	1	2	3	4	5	4	4	4	4	3	5	1	1	1	1
85	2	3	3	3	2	2	3	3	1	1	2	1	1	2	2	2	3	3	2	1	4	4	4	4	4	4	4	4	4	4	4	4	4	4	2	2	3	1	1	2	3	1	3	1	1	3
86	3	3	4	4	3	3	5	4	3	4	5	5	4	5	3	5	4	5	5	5	3	2	1	3	3	1	1	1	3	2	2	2	3	2	3	4	5	5	5	5	5	5	5	3	4	5
87	3	5	5	4	4	3	4	3	4	5	3	3	4	3	4	1	1	1	1	1	2	2	3	1	3	1	3	2	3	3	1	3	3	2	4	4	4	5	3	3	3	3	3	3	3	3
88	4	2	3	2	4	4	3	2	3	3	4	1	1	1	1	4	3	4	2	4	2	2	4	4	2	2	3	3	2	4	2	3	4	4	2	3	2	3	3	4	4	4	3	2	3	3
89	2	4	4	4	4	5	5	5	5	5	5	2	4	3	2	4	4	2	3	2	2	3	2	2	4	2	4	2	3	2	2	3	2	4	2	4	3	4	2	2	4	3	3	3	4	2
90	4	2	4	3	4	2	4	4	3	2	3	3	2	3	2	2	4	3	4	3	3	4	2	4	2	3	3	2	2	3	4	3	4	3	2	3	4	3	3	3	3	2	3	3	3	4
91	1	1	1	1	1	4	3	5	5	4	3	3	5	4	5	4	3	5	3	4	1	3	2	3	2	2	1	1	2	2	2	1	1	2	3	3	5	3	5	5	4	5	4	3	4	4
92	5	5	5	5	5	4	5	3	5	5	4	3	5	5	4	4	5	4	5	4	2	1	1	1	2	3	2	3	3	3	3	3	2	1	4	5	5	3	4	5	5	5	3	3	5	4
93	4	5	5	4	3	5	4	5	3	5	3	1	1	1	1	4	5	3	3	5	2	3	3	3	3	3	3	2	1	1	1	2	1	1	3	4	5	3	3	5	3	5	3	3	5	3
94	3	2	2	2	4	4	2	4	4	4	4	5	5	5	5	4	2	3	2	3	3	4	4	4	2	2	4	2	4	2	4	3	3	3	2	2	4	3	3	3	2	2	3	4	3	2
95	2	2	2	2	2	2	3	3	3	1	2	2	3	2	3	2	2	1	2	3	4	3	5	5	4	4	5	4	3	4	4	4	4	3	2	1	2	2	3	3	3	3	3	2	1	1
96	4	2	2	2	4	4	4	3	2	2	4	4	2	3	4	3	3	2	2	4	1	1	1	1	1	1	1	1	1	1	1	1	1	1	3	2	3	2	4	2	3	4	2	4	3	3
97	4	2	2	4	4	4	2	4	2	4	3	4	4	3	4	4	2	4	3	3	3	3	2	3	3	4	2	2	3	3	2	3	3	4	4	3	4	2	3	3	2	2	5	5	5	5
98	1	1	3	2	3	3	3	2	2	2	3	3	2	1	1	2	2	2	2	2	3	3	5	4	5	3	3	5	5	5	3	3	5	4	2	2	2	1	3	1	2	3	1	2	1	1
99	3	3	3	2	2	4	3	2	4	4	4	2	4	3	3	4	4	4	3	2	3	2	4	2	3	2	3	4	3	2	2	4	3	3	4	4	4	4	2	2	3	4	3	4	2	3
100	4	3	5	5	5	5	5	5	5	5	5	5	4	3	3	5	5	3	3	4	3	1	3	1	3	1	2	2	3	3	3	3	2	3	4	3	4	4	4	4	4	3	5	5	4	5
101	3	3	3	4	4	4	4	4	4	3	2	3	3	2	4	2	4	2	2	3	4	2	2	3	3	2	2	4	2	2	4	4	3	2	3	4	4	2	4	3	4	4	2	2	4	2
102	2	1	3	3	1	2	3	1	3	2	1	1	3	3	3	3	3	2	2	2	4	4	4	4	4	4	4	4	4	4	4	4	4	4	3	3	2	2	2	2	1	2	2	3	2	2
103	5	3	5	4	3	4	4	3	5	4	4	5	4	3	3	3	3	5	4	4	3	1	1	2	1	1	2	3	2	2	1	2	1	2	5	5	3	3	5	5	3	5	1	1	1	1
104	4	4	3	2	2	4	3	2	2	4	3	2	2	3	3	4	2	3	3	2	2	2	2	2	2	3	2	4	4	2	2	2	2	4	2	2	4	4	3	4	3	3	4	4	4	4
105	3	1	3	2	2	1	3	1	1	3	1	2	1	3	3	2	1	2	1	2	4	3	4	4	4	4	3	3	5	5	4	5	3	4	3	2	3	2	1	3	1	2	2	2	2	2
106	1	1	1	1	1	3	4	4	3	5	3	4	3	5	4	3	4	5	5	4	1	2	1	2	2	2	3	2	3	3	3	2	1	1	5	3	4	3	4	5	4	4	4	4	3	5
107	4	2	3	3	4	2	3	3	4	4	3	5	5	5	5	3	4	3	2	2	3	2	2	2	4	3	2	2	2	3	2	4	2	4	4	2	4	3	3	2	4	4	4	4	3	2
108	3	2	1	1	2	2	1	1	2	2	3	2	2	3	2	2	2	1	1	3	5	3	3	4	4	3	5	3	5	5	3	5	4	3	2	3	1	1	3	2	2	2	2	2	2	2
109	2	2	2	3	3	3	4	3	4	3	2	2	2	3	4	4	4	3	3	2	5	5	5	5	5	5	5	5	5	5	5	5	5	5	2	2	2	2	2	2	2	2	2	2	2	2
110	4	3	5	3	5	3	3	4	3	4	3	5	5	3	4	4	4	5	3	5	3	1	2	1	1	3	1	1	3	3	3	3	3	2	5	3	3	5	3	3	5	3	1	1	1	1
111	3	4	3	4	3	4	2	2	4	3	4	2	3	3	3	2	2	2	4	4	2	3	2	3	3	3	2	4	2	3	2	2	4	2	3	4	4	4	3	3	2	4	3	4	4	4
112	4	2	3	3	3	2	2	2	3	4	3	2	3	2	2	4	3	3	4	2	2	3	2	4	4	2	4	2	4	2	4	2	3	3	2	4	3	2	5	5	5	5	4	2	2	4
113	2	3	1	1	2	3	3	3	1	1	3	2	2	2	2	3	2	2	2	3	4	5	4	3	5	4	5	5	4	5	3	4	3	5	2	2	2	2	2	1	3	1	1	2	2	2
114	5	5	4	5	5	5	4	5	3	3	5	3	5	3	3	4	5	5	5	4	5	5	5	5	5	5	5	5	5	5	5	5	5	5	5	4	3	4	3	4	5	4	5	5	4	4
115	3	2	1	2	1	2	1	2	2	1	1	2	2	3	3	2	2	2	2	2	4	4	5	4	3	4	4	5	5	3	3	3	4	5	2	1	3	1	2	1	3	2	3	1	3	3
116	3	4	4	3	4	4	5	4	5	4	5	3	5	3	3	5	5	5	5	5	2	3	3	2	3	2	2	2	3	1	2	1	1	3	3	4	3	4	5	5	4	5	4	5	3	4
117	3	2	3	3	2	4	4	4	4	2	4	3	4	3	4	4	4	4	3	2	1	1	1	1	1	1	1	1	1	1	1	1	1	1	4	4	2	2	2	2	2	2	3	2	2	4
118	4	2	4	2	2	2	2	3	4	4	2	4	2	2	3	3	3	2	4	2	4	3	2	3	2	2	2	2	2	3	4	3	4	3	4	3	3	4	5	5	5	5	2	4	2	3
119	2	2	2	2	2	2	2	2	2	2	2	2	2	2	2	2	2	2	2	2	4	4	4	4	4	4	4	4	4	4	4	4	4	4	2	2	2	2	1	1	1	1	2	2	2	2
120	3	4	3	2	4	3	2	3	2	4	4	2	2	4	4	2	2	2	4	4	3	3	2	4	3	4	4	4	3	4	2	4	2	2	2	3	3	3	4	2	4	4	4	2	4	2
121	2	4	2	2	2	4	4	2	3	3	4	3	3	4	3	4	4	4	4	2	2	2	4	2	3	2	2	2	4	2	2	3	3	3	4	2	3	3	3	2	2	3	2	2	4	3
122	4	4	4	4	2	3	2	4	2	4	2	2	3	2	2	1	1	1	1	1	2	3	2	4	3	2	3	3	2	3	2	3	2	4	4	3	4	4	4	3	4	4	4	4	3	4
123	4	3	3	5	3	4	5	3	4	4	5	4	3	4	3	3	5	5	3	4	1	2	2	1	3	3	3	2	2	3	1	3	1	2	5	5	5	5	5	5	5	5	4	5	4	4
124	3	3	4	5	5	5	4	5	5	3	3	5	4	5	4	4	3	3	4	4	2	1	3	2	2	3	1	1	2	1	1	3	3	1	4	5	3	4	5	3	3	4	5	5	5	5
125	5	5	5	5	5	3	3	3	3	5	5	3	5	4	5	4	4	5	3	4	3	1	2	3	3	1	2	1	1	2	2	3	1	1	4	3	4	3	3	4	3	3	3	3	5	3
126	5	4	4	5	3	4	3	3	3	4	3	5	4	5	5	4	4	4	3	5	1	3	2	3	2	2	3	2	1	1	2	2	2	1	4	4	5	4	1	1	1	1	5	5	4	4
127	3	4	4	2	4	4	2	2	2	3	2	3	2	3	4	2	4	3	4	4	3	4	2	2	4	2	3	4	3	4	2	3	3	4	5	5	5	5	2	3	3	2	4	4	4	4
128	5	5	5	5	5	3	2	3	3	4	3	2	2	4	2	3	4	4	4	3	2	3	3	3	2	4	2	2	2	4	2	3	3	3	3	2	2	4	4	4	3	4	2	3	4	2
129	3	4	4	4	4	2	3	4	3	4	3	3	4	4	4	3	4	3	3	2	2	3	2	4	2	4	4	2	4	2	2	3	2	4	5	5	5	5	2	4	3	3	4	3	3	3
130	4	2	3	3	3	3	3	2	4	4	4	2	3	4	4	4	2	3	2	3	1	1	1	1	1	1	1	1	1	1	1	1	1	1	2	2	3	3	4	4	3	2	4	2	4	4
131	2	3	2	2	4	4	4	2	3	3	4	5	5	5	5	4	2	3	3	4	3	3	2	4	2	2	2	2	4	2	2	3	3	4	4	2	2	3	2	3	4	4	2	4	3	4
132	3	3	4	4	2	4	2	2	3	2	3	2	3	4	3	3	4	4	3	3	5	5	5	5	5	5	5	5	5	5	5	5	5	5	2	2	2	2	2	2	2	2	2	2	2	2
133	5	5	5	5	5	4	4	3	4	2	3	4	4	2	2	3	4	4	4	4	3	2	4	3	2	2	2	2	2	3	2	4	3	2	4	4	2	4	2	4	4	3	4	2	4	3
134	3	3	4	3	2	2	4	4	2	2	3	4	2	3	4	3	4	4	4	4	2	3	4	4	2	3	4	2	2	4	4	3	4	2	4	3	4	4	4	2	3	4	4	4	3	4
135	4	3	4	5	5	3	4	4	5	5	3	5	3	4	5	4	4	4	3	3	3	2	3	2	2	2	2	3	1	3	3	3	2	2	5	4	5	5	4	3	5	5	5	5	5	5
136	4	4	3	4	4	4	4	4	4	3	4	2	3	3	3	5	5	5	5	5	2	2	3	4	4	2	2	2	2	4	3	3	4	2	3	4	2	4	2	3	4	4	4	4	2	4
137	3	2	3	3	2	2	4	2	3	3	4	4	2	4	3	5	5	5	5	5	2	3	4	2	4	3	4	2	3	2	4	4	2	4	2	3	2	3	2	4	4	2	2	4	3	3
138	2	2	3	2	3	3	2	2	2	1	2	2	1	1	1	3	1	1	1	1	4	4	4	4	4	4	4	4	4	4	4	4	4	4	1	2	3	1	3	1	2	2	3	3	2	2
139	3	2	3	3	4	4	2	3	2	4	4	4	4	2	2	5	5	5	5	5	2	3	2	3	3	3	2	2	2	3	2	2	3	4	3	2	2	2	2	4	3	2	2	2	4	3
140	2	3	4	4	2	3	4	3	4	2	2	3	3	3	2	4	4	2	3	2	4	4	4	4	4	4	2	4	4	2	4	2	4	2	3	4	4	4	3	4	4	2	4	4	4	3
141	3	2	2	3	2	3	2	3	3	3	2	2	3	1	2	3	2	1	3	2	4	5	4	4	4	3	5	3	4	4	3	3	5	3	2	2	2	2	1	3	3	1	2	2	1	3
142	5	4	5	4	5	5	3	4	3	5	4	1	1	1	1	4	5	4	5	4	1	2	1	3	3	2	1	1	2	2	1	2	1	2	4	3	3	3	3	5	3	3	4	4	5	5
143	5	3	3	4	5	5	5	5	4	5	3	4	5	4	5	1	1	1	1	1	1	1	1	2	2	2	1	1	3	2	1	2	2	3	5	4	3	4	4	3	4	4	5	3	4	3
144	3	4	3	5	3	4	4	3	4	3	5	3	4	4	4	4	5	4	5	4	1	1	2	2	2	2	2	2	2	1	3	1	3	3	3	3	3	5	5	5	5	3	1	1	1	1
145	1	3	1	1	2	3	1	2	1	3	3	2	2	2	2	3	3	1	3	3	5	4	3	5	5	5	5	3	5	3	3	5	4	3	2	2	2	2	1	2	1	1	3	3	1	3
146	2	4	3	4	3	3	4	4	3	2	4	5	5	5	5	3	4	3	4	4	4	4	4	4	4	3	4	3	2	4	4	3	3	2	4	3	4	4	4	2	2	4	4	2	3	4
147	4	3	3	5	3	5	3	5	5	5	4	1	1	1	1	5	4	3	3	5	1	3	3	1	1	3	2	1	1	3	2	1	3	3	3	5	4	5	4	5	5	4	3	4	5	4
148	2	4	3	4	3	5	5	5	5	5	5	4	4	4	3	4	4	2	3	3	2	3	4	3	2	2	4	2	4	2	3	2	2	3	4	2	2	4	2	3	2	2	3	3	3	2
149	3	4	4	3	5	3	4	4	5	3	3	4	5	5	4	4	5	3	5	4	1	1	1	2	3	3	1	2	1	3	3	2	2	3	1	1	1	1	3	5	3	4	5	4	3	4
150	3	2	3	4	4	3	4	2	2	2	2	3	2	2	3	3	3	2	4	2	3	2	4	2	2	3	2	4	2	4	4	4	3	4	3	4	4	2	5	5	5	5	2	3	4	2
151	3	4	2	4	3	2	3	4	3	2	3	3	4	2	2	3	4	2	2	4	2	4	4	2	3	3	3	3	3	2	2	4	3	4	4	2	4	2	4	4	4	4	3	3	4	3
152	4	4	2	4	4	3	4	3	4	2	3	4	3	3	2	3	2	3	3	3	1	1	1	1	1	1	1	1	1	1	1	1	1	1	4	4	4	3	4	4	2	3	3	4	4	2
153	2	2	4	2	2	4	3	2	2	3	2	3	2	4	4	3	2	2	3	4	2	2	3	2	4	2	3	4	4	4	2	3	2	2	4	4	3	3	3	4	3	4	3	4	3	2
154	4	3	2	2	4	3	3	4	2	4	3	3	4	2	2	4	3	4	4	3	4	2	2	4	3	3	3	2	3	2	4	4	2	2	2	3	2	4	2	2	3	4	2	2	4	3
155	3	2	3	4	4	4	4	2	3	3	2	4	4	4	2	4	4	2	3	4	3	4	4	2	2	4	2	3	3	2	2	2	2	2	4	2	3	4	2	3	2	4	3	2	2	4
156	3	3	3	2	4	2	4	2	4	2	2	5	5	5	5	2	3	4	2	4	3	2	4	4	3	3	2	4	4	3	3	4	4	4	4	2	3	3	4	3	2	2	3	2	4	2
157	2	3	2	2	4	4	2	3	3	2	4	4	4	4	4	2	4	2	3	3	4	3	3	4	3	3	2	4	4	3	3	2	3	4	4	4	4	3	4	3	4	2	2	4	2	2
158	3	4	2	2	4	2	3	2	4	2	2	3	4	3	2	2	3	4	3	4	3	2	2	2	3	3	2	2	2	4	4	4	2	2	4	2	3	4	2	4	2	2	3	4	3	2
159	3	5	3	4	4	4	5	3	4	3	4	3	5	3	5	1	1	1	1	1	2	2	3	2	3	3	3	3	1	3	1	2	1	2	3	5	5	4	5	4	5	3	4	5	3	5
160	2	2	2	2	2	2	2	2	2	2	2	2	2	2	2	2	2	2	2	2	4	4	4	4	4	4	4	4	4	4	4	4	4	4	2	2	2	2	2	2	2	2	1	1	1	1
161	3	3	5	5	4	4	4	4	4	3	4	4	3	3	5	5	5	5	5	5	1	1	2	3	3	2	3	3	1	1	1	1	1	2	4	4	4	3	5	5	4	5	4	3	4	4
162	3	4	3	4	3	3	4	3	3	2	2	4	2	4	2	5	5	5	5	5	3	4	2	4	4	3	2	2	3	3	2	3	3	4	2	2	2	2	4	4	4	3	4	4	3	3
163	2	3	3	4	3	4	4	4	4	3	3	5	5	5	5	4	2	3	4	4	2	3	2	3	3	3	3	4	2	2	2	2	3	3	3	2	3	2	2	4	2	2	4	4	2	4
164	4	4	3	5	4	5	4	3	3	5	4	3	5	4	5	3	4	4	4	4	5	5	5	5	5	5	5	5	5	5	5	5	5	5	4	5	4	4	3	3	3	5	5	3	5	5
165	4	4	2	3	2	4	3	2	3	2	2	4	2	4	4	4	4	3	4	4	4	3	2	3	2	2	4	2	2	2	3	2	2	3	2	2	4	2	4	2	4	3	4	2	4	3
166	2	2	2	2	2	2	1	3	1	2	2	1	3	1	3	2	1	1	2	1	4	3	4	5	5	3	4	5	5	4	3	4	3	3	2	1	3	1	3	3	3	2	2	3	1	3
167	4	4	3	4	3	1	1	1	1	1	1	4	3	3	4	4	4	3	4	3	2	2	3	2	2	1	3	1	3	3	1	1	1	1	5	4	4	4	4	5	4	4	5	3	3	4
168	1	1	1	1	1	4	3	3	3	4	3	5	4	3	3	5	4	5	3	3	3	3	2	1	2	3	1	2	2	3	3	1	1	2	5	5	4	5	4	3	5	3	4	5	4	4
169	5	3	4	5	3	3	4	4	5	4	4	5	5	5	4	5	5	3	3	3	3	2	2	3	2	3	3	2	1	1	1	3	3	3	3	5	5	5	4	5	3	5	1	1	1	1
170	5	5	5	5	5	2	2	4	3	4	3	2	3	4	2	2	3	3	4	3	4	2	4	3	2	2	4	4	4	4	3	2	3	4	4	3	2	2	4	4	4	2	4	2	2	4
171	3	3	2	3	4	4	3	3	2	2	3	3	3	4	4	4	3	4	3	4	2	4	4	2	3	3	2	4	4	4	4	3	4	2	2	2	2	4	3	3	2	2	5	5	5	5
172	2	2	2	2	2	1	2	2	1	2	2	1	3	1	1	3	1	3	1	2	5	3	4	5	4	4	5	3	5	4	4	3	4	4	3	1	2	1	2	3	2	1	2	1	3	3
173	4	2	3	3	2	2	3	4	4	2	2	4	4	3	2	2	3	2	4	2	2	3	4	2	3	2	2	3	3	2	2	3	2	4	3	3	4	2	2	3	2	3	3	3	3	4
174	3	4	2	2	4	2	2	4	2	4	4	4	4	3	4	2	2	2	2	2	3	2	3	4	4	2	4	3	2	2	3	4	4	2	2	4	2	3	2	2	2	2	3	3	4	2
175	2	2	2	2	2	2	2	2	2	2	2	2	2	2	2	2	2	2	2	2	4	4	4	4	4	4	4	4	4	4	4	4	4	4	1	1	1	1	2	2	2	2	2	2	2	2
176	5	5	5	5	5	3	5	4	3	4	4	5	5	3	3	3	5	4	3	4	2	2	1	3	2	1	3	1	2	2	2	1	3	3	3	5	3	5	5	4	3	5	3	4	5	5
177	3	4	4	3	5	3	4	4	3	4	5	1	1	1	1	3	4	3	4	3	3	3	2	3	2	1	2	3	2	1	3	1	1	1	3	4	4	4	5	5	5	5	5	3	4	3
178	3	4	4	4	3	1	1	1	1	1	1	4	5	5	4	4	5	3	5	4	1	3	2	2	3	1	3	1	1	2	1	1	1	2	4	5	5	5	5	3	5	4	3	5	4	3
179	2	4	4	3	4	2	2	2	2	2	2	4	2	2	3	4	2	2	4	3	4	2	3	3	2	2	4	3	2	2	3	3	2	4	3	2	4	3	3	4	3	4	4	3	4	3
180	3	4	3	5	4	1	1	1	1	1	1	3	4	3	4	5	4	5	5	4	3	3	1	2	3	3	3	3	2	2	2	1	1	1	5	5	4	5	4	4	3	5	5	4	4	5
181	2	2	2	2	4	2	2	2	3	2	2	5	5	5	5	3	2	3	3	4	3	3	4	4	3	2	4	2	2	2	4	4	2	4	4	4	4	2	2	2	4	4	2	4	2	2
182	3	4	2	4	3	2	2	2	4	4	2	3	3	3	2	3	3	4	2	2	2	2	4	4	2	2	2	2	3	2	2	2	4	4	4	4	3	3	3	4	4	2	2	4	4	4
183	5	5	5	5	5	4	3	4	2	4	4	3	4	2	4	3	2	3	3	4	2	2	3	3	4	4	2	3	4	2	3	4	3	4	3	2	4	4	2	2	2	3	3	4	3	4
184	3	4	2	4	4	4	4	4	2	4	3	4	3	2	3	4	2	2	2	4	3	3	4	2	3	2	3	4	3	2	4	3	3	2	4	4	2	3	3	4	2	2	5	5	5	5
185	2	3	2	4	4	2	2	3	2	4	3	4	4	2	4	4	4	3	3	4	4	3	2	2	2	4	4	2	2	3	3	3	2	2	2	4	4	4	4	2	2	4	5	5	5	5
186	4	3	3	2	4	2	3	2	3	2	3	3	4	2	4	2	2	4	2	2	3	3	3	2	4	3	4	3	3	2	4	2	3	2	2	4	2	4	4	2	4	2	2	3	3	3
187	3	2	2	4	3	5	5	5	5	5	5	4	4	4	3	2	2	2	3	4	2	4	2	4	3	4	2	2	4	2	2	2	4	3	2	3	3	3	2	4	3	2	4	2	2	2
188	2	3	2	2	3	3	4	2	4	4	2	3	4	2	2	4	3	2	4	3	4	3	2	4	2	2	3	2	3	2	4	2	2	3	5	5	5	5	4	4	2	4	2	4	4	4
189	3	5	3	4	4	4	3	4	3	4	4	4	5	5	4	1	1	1	1	1	1	1	1	3	3	1	3	1	1	2	3	3	1	3	4	3	3	5	5	3	5	5	5	4	3	3
190	4	4	3	3	3	3	4	5	5	3	5	5	4	4	3	4	5	3	5	3	3	3	1	1	2	1	2	1	3	3	2	2	1	2	4	3	3	3	5	5	5	5	3	5	4	3
191	2	3	3	4	3	2	4	3	4	4	4	4	3	2	3	4	2	4	3	4	4	4	4	4	4	2	2	3	2	4	4	4	4	3	4	4	4	3	2	2	2	4	4	4	3	3
192	3	3	2	3	3	2	4	3	4	3	4	2	4	4	4	2	4	2	3	4	3	3	2	4	2	2	4	2	2	4	2	3	2	3	3	2	2	3	5	5	5	5	3	2	3	4
193	4	4	3	3	3	3	3	3	4	4	3	2	2	3	2	2	3	4	2	2	3	3	4	2	2	2	3	2	4	3	4	2	4	2	3	4	2	4	3	2	2	3	4	4	3	4
194	2	3	3	2	4	4	4	4	4	3	3	2	4	4	4	4	4	2	3	4	4	4	2	3	3	2	3	4	2	2	2	4	3	3	3	2	2	3	2	3	4	4	4	2	3	4
195	1	1	1	1	1	4	4	4	2	2	3	3	4	2	3	2	4	3	4	3	3	2	4	3	4	3	4	4	3	3	3	4	2	4	2	4	3	3	4	2	4	3	2	3	3	4
196	3	4	4	4	4	2	3	3	2	2	3	3	4	2	2	2	2	2	2	4	1	1	1	1	1	1	1	1	1	1	1	1	1	1	2	2	4	3	3	3	4	2	3	2	2	2
197	2	2	4	4	3	2	2	3	3	4	2	4	2	3	3	4	4	2	4	3	2	3	2	2	2	4	3	2	4	4	2	4	2	4	5	5	5	5	3	3	4	3	2	2	4	3
198	4	4	4	2	3	3	2	4	2	4	2	4	4	4	3	3	4	4	4	4	4	2	2	2	3	4	2	3	2	4	3	2	3	3	4	3	4	4	4	2	3	4	3	2	3	3
199	5	5	3	4	5	1	1	1	1	1	1	3	4	5	4	4	5	5	5	4	1	1	1	1	3	2	1	1	1	2	2	3	1	1	3	4	3	5	4	5	5	4	4	4	5	5
200	3	4	5	3	4	5	4	4	4	4	4	3	3	5	5	5	5	4	5	5	3	2	2	1	2	2	3	2	2	1	1	3	1	3	4	5	5	4	4	4	5	3	5	5	5	5
201	4	4	3	2	4	2	2	3	2	2	3	2	4	2	3	5	5	5	5	5	2	2	2	3	3	4	3	2	4	4	4	3	2	4	4	4	2	4	2	3	3	4	3	4	4	2
202	4	2	2	2	3	2	4	4	3	2	3	4	4	2	2	3	4	3	3	2	3	3	2	2	2	2	2	2	4	2	4	2	2	3	3	3	4	2	4	2	3	3	2	4	3	2
203	3	3	4	4	3	5	5	5	5	5	5	2	3	2	4	3	3	3	4	4	3	4	3	2	4	3	3	3	2	4	4	2	3	4	3	3	2	3	4	4	2	3	3	2	4	2
204	3	4	2	2	3	4	4	3	3	3	3	3	3	3	4	3	4	3	2	4	3	4	2	4	2	4	3	4	2	3	4	4	3	3	3	4	2	4	5	5	5	5	2	2	2	4
205	3	3	1	2	3	2	1	2	3	3	3	2	1	1	1	1	2	2	2	2	3	4	3	4	4	4	3	5	4	5	4	3	5	4	2	1	3	1	2	2	2	2	3	2	3	2
206	5	5	5	3	5	5	5	5	5	5	5	4	5	4	5	3	3	3	3	5	1	3	3	2	1	1	3	1	3	2	3	3	1	1	5	5	4	5	5	3	4	5	5	4	5	4
207	2	2	2	2	2	2	2	2	2	2	2	2	2	2	2	2	2	2	2	2	4	4	4	4	4	4	4	4	4	4	4	4	4	4	1	1	1	1	2	2	2	2	2	2	2	2
208	1	1	1	1	1	2	2	4	4	3	4	2	4	4	3	2	4	2	4	3	2	2	3	3	3	3	4	2	3	3	2	4	3	4	2	3	4	2	3	2	2	4	2	3	3	2
209	3	3	3	2	1	2	2	2	2	2	2	2	2	3	2	1	2	2	2	3	4	5	4	4	5	5	5	3	5	5	3	3	5	4	2	2	2	3	1	1	1	2	3	2	2	3
210	3	5	5	5	4	5	5	5	5	5	5	4	3	3	3	5	3	4	5	5	3	2	3	2	3	3	1	1	3	1	1	1	2	2	5	3	5	5	5	3	5	4	5	5	4	4
211	5	3	3	5	4	1	1	1	1	1	1	3	5	4	4	4	4	5	3	4	1	2	3	2	3	1	2	3	2	1	1	3	2	1	4	3	4	5	4	5	4	4	4	3	5	4
212	3	2	3	3	2	2	4	4	3	2	4	3	2	4	3	4	3	4	4	4	4	2	4	3	2	3	2	4	2	2	2	3	4	3	4	2	3	4	5	5	5	5	2	3	2	2
213	5	3	4	3	3	5	4	5	3	3	5	5	5	4	4	3	3	4	3	3	5	5	5	5	5	5	5	5	5	5	5	5	5	5	5	4	4	4	4	4	3	3	4	3	5	5
214	4	4	4	4	3	3	4	4	4	3	3	4	3	2	3	5	5	5	5	5	3	4	4	4	2	3	2	2	3	3	2	4	2	3	3	3	2	4	4	2	4	3	4	4	2	4
215	4	5	3	3	3	4	4	4	5	4	4	5	5	5	5	4	5	3	4	4	1	3	2	3	2	2	2	1	2	3	1	3	3	2	4	3	5	4	5	4	4	4	3	3	4	5
216	2	4	3	2	3	5	5	5	5	5	5	4	4	4	3	2	2	4	2	3	2	2	2	3	2	2	4	3	3	2	3	3	2	4	2	3	4	4	2	4	4	4	2	4	4	2
217	4	4	4	4	4	3	3	3	3	2	2	2	2	2	4	3	4	2	4	3	1	1	1	1	1	1	1	1	1	1	1	1	1	1	4	3	3	4	4	2	3	3	2	3	2	4
218	4	2	3	4	4	4	4	2	2	3	4	4	3	2	3	2	3	3	2	3	2	4	4	2	2	3	4	2	4	4	2	4	4	2	2	4	3	3	5	5	5	5	4	4	2	2
219	5	5	5	5	5	2	4	3	4	2	4	4	4	3	4	3	4	4	4	3	3	4	4	3	3	3	3	3	4	4	2	3	4	2	3	3	2	2	4	3	2	3	4	4	3	2
220	3	5	3	5	4	4	4	4	5	4	4	4	4	4	5	3	3	5	4	3	3	3	2	3	1	2	2	2	2	3	1	3	1	1	3	4	4	4	1	1	1	1	3	5	5	4
221	2	1	3	1	2	1	2	3	2	1	3	3	1	2	2	1	2	3	1	1	5	5	3	3	4	5	3	3	3	3	4	4	4	3	1	3	1	1	3	1	1	1	2	2	2	2
222	4	3	3	2	2	2	3	2	4	4	2	2	4	3	3	5	5	5	5	5	2	3	3	4	4	4	2	3	2	4	3	2	2	2	4	3	3	4	2	2	4	2	4	3	4	3
223	4	3	5	4	4	4	3	5	5	5	4	4	5	5	4	3	3	5	4	5	2	3	3	1	3	2	2	1	1	2	2	3	2	2	5	3	4	4	1	1	1	1	3	4	4	3
224	2	3	1	1	1	2	2	2	2	2	2	2	3	1	1	2	1	1	2	1	5	4	3	3	3	3	5	5	4	4	5	3	4	5	3	1	2	2	2	2	2	1	2	1	3	2
225	1	1	3	3	1	2	3	2	1	3	2	2	1	1	2	3	2	2	1	1	5	3	4	5	5	4	3	5	5	3	4	5	3	5	1	2	3	1	1	2	3	3	2	2	2	2
226	4	2	2	4	2	3	4	2	3	4	4	3	4	4	2	2	3	4	4	2	4	4	4	2	2	2	4	3	2	4	3	3	2	2	2	3	3	4	5	5	5	5	4	3	2	4
227	2	2	4	4	3	3	4	2	4	3	4	4	4	2	3	2	4	3	4	3	2	3	4	3	2	2	4	4	4	3	2	2	4	4	3	2	4	2	4	4	2	3	2	4	3	3
228	2	2	2	2	2	2	2	2	2	2	2	2	2	2	2	2	2	2	2	2	4	4	4	4	4	4	4	4	4	4	4	4	4	4	1	1	1	1	2	2	2	2	2	2	2	2
229	5	5	5	5	5	4	5	3	4	5	5	3	4	4	4	5	4	4	4	4	2	1	1	2	1	1	3	3	2	3	2	3	3	1	5	3	5	3	4	5	5	5	3	3	4	4
230	2	1	3	2	1	2	2	2	3	3	2	3	1	1	2	3	1	3	3	1	3	3	3	3	3	3	3	4	4	4	5	4	3	3	2	2	2	2	3	1	1	3	2	3	1	1
231	4	4	3	3	3	4	4	3	4	2	4	5	5	5	5	2	4	4	4	2	2	2	3	2	2	2	2	2	4	2	3	3	3	4	4	4	3	2	4	2	3	2	3	2	3	3
232	2	4	3	3	4	4	4	2	4	4	2	4	3	3	2	2	4	4	4	3	2	4	2	4	2	4	2	3	3	2	2	4	3	2	4	2	2	2	2	2	2	4	5	5	5	5
233	2	2	2	4	2	2	3	3	4	2	3	4	2	4	4	5	5	5	5	5	3	3	2	4	4	3	2	2	2	3	2	3	4	2	4	3	4	4	4	3	4	3	2	2	2	2
234	5	4	3	3	4	4	4	5	4	3	5	5	4	3	4	5	5	5	3	5	5	5	5	5	5	5	5	5	5	5	5	5	5	5	4	5	3	4	4	4	4	5	5	5	5	4
235	5	4	3	4	4	5	3	3	4	3	5	5	3	4	5	1	1	1	1	1	1	1	2	1	1	3	1	2	3	2	3	3	1	2	5	3	5	5	5	3	4	4	5	3	4	3
236	2	4	2	4	4	4	4	4	2	2	2	3	3	2	2	5	5	5	5	5	2	2	2	4	3	3	3	3	3	2	2	3	4	3	3	4	4	3	3	2	2	2	2	3	4	2
237	5	3	3	5	5	3	3	5	3	3	3	4	5	4	4	4	3	5	4	3	2	3	2	2	3	3	3	2	2	1	3	2	2	3	3	4	4	3	5	3	3	3	1	1	1	1
238	3	3	5	5	4	3	4	3	4	5	5	5	5	5	5	3	4	3	4	3	1	1	2	1	1	3	2	3	2	2	3	1	2	1	4	3	3	4	3	4	3	4	4	4	5	3
239	3	3	3	2	3	3	2	3	4	2	2	3	4	2	2	4	3	3	4	3	5	5	5	5	5	5	5	5	5	5	5	5	5	5	2	2	2	2	2	2	2	2	2	2	2	2
240	2	2	2	2	2	2	2	2	2	2	2	2	2	2	2	2	2	2	2	2	4	4	4	4	4	4	4	4	4	4	4	4	4	4	1	1	1	1	2	2	2	2	2	2	2	2
241	4	2	4	4	3	4	3	2	2	4	2	4	3	4	3	4	2	4	3	3	1	1	1	1	1	1	1	1	1	1	1	1	1	1	3	3	2	3	3	2	4	4	2	4	3	3
242	5	4	3	5	4	5	3	4	5	4	4	3	3	3	5	5	5	5	5	5	1	3	3	1	2	1	2	3	1	1	1	2	1	2	5	5	5	5	5	3	3	4	3	4	3	3
243	2	3	4	4	2	2	4	4	2	3	4	2	4	3	4	4	3	3	3	3	2	2	4	3	4	2	2	2	2	2	2	2	3	3	3	2	2	2	2	3	3	4	3	2	2	3
244	3	3	5	4	5	5	5	5	5	5	5	1	1	1	1	5	5	4	5	3	2	2	2	2	3	1	1	3	2	1	2	1	3	2	4	4	4	4	5	4	5	4	4	4	4	4
245	3	4	2	3	4	2	4	4	2	4	3	2	4	2	3	5	5	5	5	5	3	2	3	2	3	2	3	2	3	2	3	2	2	3	3	4	4	4	2	3	4	4	2	3	4	2
246	2	2	2	2	2	3	1	2	3	1	1	2	2	1	1	3	2	1	2	3	3	5	5	4	4	3	3	3	3	3	5	5	4	3	1	2	3	2	2	2	3	3	3	3	2	2
247	5	5	4	4	4	3	4	5	5	5	5	4	4	4	5	3	3	5	4	5	1	1	1	1	1	1	1	1	1	1	1	1	1	1	3	3	4	3	4	5	3	3	5	4	4	4
248	5	3	4	5	3	3	5	5	3	4	5	1	1	1	1	4	4	3	5	5	1	2	3	1	3	1	2	1	1	2	3	3	3	3	4	5	3	3	5	5	5	4	4	5	3	4
249	2	2	2	2	2	2	2	2	2	2	2	2	2	2	2	2	2	2	2	2	4	4	4	4	4	4	4	4	4	4	4	4	4	4	2	2	2	2	1	1	1	1	2	2	2	2
250	5	5	5	5	5	4	2	4	4	3	3	2	3	3	4	4	4	4	2	4	2	4	4	2	4	3	2	2	4	2	2	4	4	2	3	2	2	3	3	3	3	3	3	2	4	3
251	4	3	2	3	4	3	4	4	2	3	4	2	4	2	2	3	4	3	2	2	3	4	3	4	2	3	3	2	3	4	2	4	3	2	2	4	2	2	3	4	4	4	2	2	3	3
252	3	4	4	2	4	2	3	3	4	3	4	2	2	3	2	4	3	4	3	2	2	2	4	4	4	4	4	4	2	4	2	3	2	3	2	4	4	4	5	5	5	5	4	4	4	4
253	1	1	1	1	1	3	3	4	3	3	3	4	3	5	3	3	3	4	4	4	1	1	3	1	3	1	3	1	3	3	3	1	2	1	3	5	5	3	3	3	4	5	3	3	5	3
254	3	3	4	3	4	4	3	4	3	4	4	5	5	5	5	4	3	2	2	3	3	2	4	3	2	2	3	2	2	3	3	3	3	4	4	4	3	3	4	2	2	4	4	4	4	2
255	4	2	4	2	4	2	3	4	4	3	2	3	2	2	4	3	4	3	4	2	3	4	4	3	2	3	3	4	2	4	2	4	4	4	4	4	3	3	2	4	4	2	2	3	4	4
256	5	5	5	5	5	4	4	3	2	4	4	4	2	3	2	4	2	2	2	4	2	4	2	2	2	4	2	3	4	2	2	3	3	4	4	3	2	2	2	4	3	4	2	3	2	2
257	3	3	1	2	2	3	2	1	3	1	3	3	3	2	2	3	2	2	3	3	3	4	3	5	3	5	3	5	4	4	5	3	3	3	2	2	2	2	1	1	1	1	2	2	1	3
258	3	3	4	4	5	5	5	3	3	5	3	5	3	5	3	5	3	3	3	4	1	2	2	3	2	2	1	2	2	1	3	1	1	1	4	5	5	3	4	5	5	5	5	5	5	5
259	3	2	2	4	2	2	2	3	4	4	2	3	4	4	3	4	3	2	4	2	2	4	4	4	2	3	3	4	3	4	3	4	2	4	3	4	3	2	2	3	4	2	4	4	2	3
260	2	2	2	2	2	2	2	2	2	2	2	2	2	2	2	2	2	2	2	2	4	4	4	4	4	4	4	4	4	4	4	4	4	4	2	2	2	2	2	2	2	2	1	1	1	1
261	2	3	4	4	4	4	2	4	4	3	4	4	3	4	2	4	2	3	4	4	2	4	2	2	4	4	4	4	3	3	3	2	3	2	4	4	3	4	5	5	5	5	4	3	2	4
262	4	4	3	4	5	1	1	1	1	1	1	3	5	5	4	3	3	4	4	5	3	2	1	3	1	1	1	1	2	3	3	2	1	1	4	4	4	4	3	3	5	3	4	3	3	4
263	4	3	2	2	4	2	3	4	4	3	3	1	1	1	1	4	3	4	4	4	4	3	3	4	4	3	3	3	4	2	2	2	4	3	3	3	2	4	3	3	4	2	3	3	4	2
264	3	2	3	3	3	4	4	4	3	3	3	2	3	2	2	3	4	2	3	3	4	2	4	2	2	4	2	3	3	2	4	2	4	2	4	2	4	4	5	5	5	5	3	4	2	3
265	2	2	3	3	2	2	3	4	4	2	4	1	1	1	1	4	4	4	4	2	4	2	4	2	4	4	2	2	2	4	3	2	3	4	4	2	4	4	3	4	3	3	4	3	2	3
266	3	2	1	2	1	1	1	1	2	3	2	2	2	2	2	3	2	1	1	1	4	3	4	4	4	4	3	3	3	5	5	5	4	3	3	3	1	2	2	2	1	3	2	2	3	3
267	3	4	3	2	4	3	3	4	3	2	4	3	4	4	2	4	4	2	3	2	2	3	3	4	4	3	4	4	2	4	3	2	4	4	4	3	2	4	3	2	4	2	4	4	2	4
268	3	5	4	4	5	1	1	1	1	1	1	5	4	4	4	4	3	3	4	4	2	2	3	1	3	2	1	1	2	1	3	1	2	2	5	5	4	3	4	5	5	4	4	5	3	4
269	4	5	3	5	5	5	5	5	5	5	5	3	3	5	5	4	3	5	3	4	1	2	3	1	3	2	2	2	3	1	2	3	3	1	4	5	4	3	4	4	3	4	5	3	3	3
270	2	2	2	2	2	2	2	2	2	2	2	2	2	2	2	2	2	2	2	2	4	4	4	4	4	4	4	4	4	4	4	4	4	4	2	2	2	2	1	1	1	1	2	2	2	2
271	2	2	3	4	4	4	3	3	4	3	3	4	3	3	4	4	4	2	4	4	3	2	3	2	2	4	2	2	4	2	3	2	3	3	2	3	3	2	4	2	4	4	2	2	3	4
272	4	2	3	2	4	4	2	4	2	4	4	2	4	2	4	3	3	2	2	2	2	2	2	4	3	2	2	2	2	3	2	2	2	2	4	2	4	4	2	4	3	3	5	5	5	5
273	3	2	4	2	2	3	2	2	3	4	3	3	2	2	3	4	2	2	3	2	3	3	4	4	2	3	2	3	4	4	4	2	2	3	4	4	3	3	4	3	4	4	2	3	3	2
274	4	4	4	4	4	2	2	2	4	4	3	4	3	4	2	2	4	4	3	3	4	3	3	4	3	3	3	4	2	4	3	2	4	4	2	4	4	4	5	5	5	5	3	2	4	4
275	4	4	3	2	4	4	4	4	2	2	4	3	4	3	2	4	2	4	3	3	2	2	4	2	2	3	3	4	4	2	3	3	3	2	2	4	3	2	4	3	2	3	5	5	5	5
276	2	4	4	4	4	5	5	5	5	5	5	3	3	2	2	2	4	4	4	4	3	2	2	3	3	2	3	4	3	4	2	2	2	4	2	3	2	4	4	3	3	2	4	4	2	4
277	2	4	2	3	3	3	4	4	3	4	4	4	2	2	4	3	2	4	4	3	3	2	3	3	2	3	3	2	4	2	2	4	3	3	5	5	5	5	3	4	3	2	3	3	4	4
278	2	3	4	2	2	4	3	2	4	4	4	4	2	4	4	4	3	3	4	4	2	4	2	4	3	4	2	2	4	4	4	2	2	4	3	4	2	3	5	5	5	5	2	4	4	4
279	4	2	3	3	4	2	4	4	4	4	3	2	4	3	3	4	4	2	3	3	2	3	2	2	3	3	2	3	4	2	2	2	2	4	3	4	4	4	3	3	2	4	3	3	3	3
280	3	3	2	4	2	4	2	3	4	3	3	5	5	5	5	4	2	4	4	4	4	3	3	3	2	4	3	2	4	4	2	2	4	2	4	3	3	3	2	4	3	3	3	2	3	2
281	3	4	4	4	4	3	2	4	4	2	4	5	5	5	5	2	4	2	2	4	4	2	2	2	3	2	3	2	2	3	4	4	3	2	4	3	4	3	2	4	2	4	2	2	2	4
282	4	4	4	3	4	4	2	2	4	4	3	4	4	2	4	4	3	4	2	2	4	4	2	3	4	2	3	3	4	4	4	3	2	3	3	3	4	2	4	2	3	4	4	3	2	3
283	3	2	3	3	4	4	3	3	3	4	4	3	4	3	3	2	3	2	3	2	4	4	3	4	2	2	2	3	2	4	4	4	3	4	3	2	3	3	2	4	4	4	4	3	4	2
284	3	4	3	4	4	4	4	3	3	4	4	4	4	2	3	4	3	3	4	4	4	4	3	2	4	4	3	3	2	3	4	4	2	2	4	3	2	4	4	2	3	4	3	3	4	2
285	2	4	3	4	3	3	4	3	2	3	4	4	4	3	2	4	4	3	4	4	3	3	3	3	2	4	3	3	3	2	2	2	3	2	2	4	4	3	4	4	4	3	4	2	4	3
286	4	5	4	5	4	1	1	1	1	1	1	5	5	5	4	3	5	5	3	4	3	2	3	2	2	2	1	1	2	1	2	3	1	3	3	3	3	4	5	3	3	3	3	3	4	3
287	2	4	2	2	4	3	2	2	3	3	2	4	3	4	4	2	3	4	3	3	2	4	3	3	4	3	3	4	2	4	3	4	3	2	5	5	5	5	4	4	2	4	4	2	4	3
288	2	2	2	2	2	2	1	1	3	3	1	1	3	3	2	1	1	1	3	3	4	5	5	3	3	4	3	4	5	5	5	3	4	3	2	3	2	2	2	3	3	2	3	3	3	3
289	3	4	5	5	5	5	5	3	5	3	4	3	5	4	4	5	4	3	5	5	3	1	2	2	2	2	2	1	1	2	1	3	3	1	5	5	5	5	3	5	3	3	1	1	1	1
290	4	3	3	4	4	3	3	3	3	4	3	5	3	4	5	4	3	3	4	5	3	3	2	2	2	2	1	1	1	3	3	2	1	1	3	5	5	5	1	1	1	1	4	3	5	4
291	3	4	3	4	3	4	5	5	4	3	3	3	3	3	4	3	3	5	4	4	2	1	2	2	3	2	3	1	3	2	3	1	3	3	1	1	1	1	5	3	5	3	4	3	3	3
292	4	3	4	4	4	4	2	3	4	3	4	3	4	3	3	4	3	4	4	3	3	3	3	3	4	3	3	2	3	4	2	4	4	2	5	5	5	5	3	2	4	2	2	3	4	2
293	2	4	2	2	4	3	3	3	3	3	3	2	4	4	2	5	5	5	5	5	3	3	2	2	3	4	4	4	4	4	3	3	2	2	3	2	2	3	4	3	3	4	4	4	4	4
294	3	4	4	4	4	3	4	3	3	3	4	2	2	2	4	4	4	2	4	2	3	2	3	3	3	2	2	3	3	3	2	4	2	2	5	5	5	5	3	4	4	2	3	4	2	4
295	4	4	5	5	5	3	4	3	3	4	3	5	4	5	5	5	4	3	4	5	1	3	3	1	1	3	1	3	2	2	2	3	3	1	5	4	4	3	1	1	1	1	3	4	4	5
296	4	4	3	4	4	4	4	2	2	4	4	4	3	4	2	2	2	4	2	3	5	5	5	5	5	5	5	5	5	5	5	5	5	5	2	2	2	2	2	2	2	2	2	2	2	2
297	5	5	5	5	5	3	4	4	2	4	4	3	3	4	4	3	2	3	4	3	2	3	2	4	2	4	4	4	3	3	4	4	3	4	2	3	2	4	3	3	3	3	3	4	2	4
298	4	4	5	3	3	5	5	5	3	5	3	4	5	4	5	5	5	3	4	5	2	2	1	1	1	3	2	2	3	2	2	1	1	2	5	3	4	3	4	4	5	4	1	1	1	1
299	2	4	3	2	3	5	5	5	5	5	5	3	3	2	2	3	3	4	4	2	4	4	2	4	4	2	4	2	3	3	2	2	2	4	4	4	4	3	4	4	2	4	3	4	4	3
300	3	5	3	4	4	4	5	3	5	3	5	4	4	4	4	5	4	3	3	5	2	3	2	1	3	3	3	2	2	3	2	3	3	3	3	3	4	5	4	3	3	4	1	1	1	1
301	4	3	3	3	4	4	2	4	3	2	3	4	4	3	4	4	3	2	3	3	1	1	1	1	1	1	1	1	1	1	1	1	1	1	3	4	4	2	2	4	2	4	2	4	4	4
302	1	1	1	1	1	3	5	3	4	5	4	5	3	4	5	5	5	4	5	3	2	1	3	3	1	3	1	3	2	1	2	3	2	3	5	3	4	5	4	3	3	3	3	5	5	3
303	5	3	5	5	4	4	3	3	4	3	5	5	4	3	3	1	1	1	1	1	2	1	2	2	1	3	1	3	2	1	2	2	2	1	4	4	4	5	4	5	3	4	4	4	3	5
304	3	4	3	3	3	4	4	4	3	4	3	2	4	3	3	4	2	3	4	3	5	5	5	5	5	5	5	5	5	5	5	5	5	5	2	2	2	2	2	2	2	2	2	2	2	2
305	5	3	3	5	4	5	3	4	3	5	4	4	4	5	4	5	3	4	4	5	1	2	1	1	3	3	3	1	2	3	2	1	1	3	5	5	5	5	3	5	5	4	4	3	4	3
306	2	2	2	2	2	5	5	5	5	4	4	2	2	2	2	5	4	3	4	4	2	1	2	3	1	1	3	2	2	1	1	1	2	2	5	5	3	4	1	1	1	1	3	4	5	3
307	4	2	3	2	3	4	4	4	4	2	4	3	4	4	3	3	4	3	3	4	5	5	5	5	5	5	5	5	5	5	5	5	5	5	2	2	2	2	2	2	2	2	2	2	2	2
308	3	1	1	3	2	2	2	2	2	2	2	3	3	1	1	1	1	2	2	2	3	4	4	4	4	4	5	3	5	5	4	4	4	3	2	1	3	1	2	3	2	2	1	3	1	2
309	5	4	4	3	3	3	3	5	3	3	5	4	5	5	4	5	3	4	3	3	1	3	1	1	2	2	2	2	1	2	2	2	2	2	1	1	1	1	5	4	3	5	4	4	5	5
310	4	2	2	3	2	2	4	2	2	4	4	2	4	4	3	1	1	1	1	1	4	4	2	4	2	2	4	2	3	2	4	2	4	4	4	3	4	4	4	3	3	2	2	2	4	3
311	4	3	3	4	3	3	3	4	5	5	3	3	5	3	3	1	1	1	1	1	2	3	3	2	2	2	2	1	3	1	2	1	3	2	1	1	1	1	5	3	4	4	5	3	4	5
312	4	3	4	5	5	4	5	5	5	3	4	4	5	4	4	1	1	1	1	1	1	3	2	3	1	2	1	3	3	1	3	2	2	2	4	3	5	4	4	3	4	4	4	4	4	4
313	3	2	4	4	4	3	4	3	3	2	3	4	2	3	3	3	4	3	4	4	3	3	3	4	4	4	4	3	2	2	4	4	4	4	2	3	3	4	4	4	3	2	4	3	2	4
314	5	3	3	3	4	4	3	3	4	3	5	5	4	3	3	3	4	3	5	4	1	3	3	2	2	2	3	3	1	3	3	3	3	3	4	5	3	3	5	5	5	5	4	5	3	5
315	3	2	2	4	4	3	4	4	4	4	3	4	2	4	4	3	4	4	3	3	3	2	4	3	3	2	3	4	2	4	4	2	3	4	4	4	4	3	3	2	4	3	3	3	3	4
316	4	2	3	4	4	4	4	4	3	4	3	3	4	4	4	3	3	2	3	4	4	4	2	2	2	2	4	3	3	4	4	2	4	2	3	2	3	2	2	2	4	4	4	4	2	4
317	5	5	5	5	5	3	3	4	2	4	4	3	3	4	4	4	4	3	3	3	3	3	4	2	4	2	2	2	3	2	4	3	3	4	2	4	4	3	3	4	4	3	4	2	2	2
318	5	5	5	5	5	2	4	2	3	3	3	2	3	3	3	2	4	4	3	4	4	2	2	2	2	2	3	2	3	3	4	4	3	3	4	2	2	4	3	4	4	2	3	4	4	4
319	5	5	5	5	5	3	4	2	4	4	3	4	4	4	2	3	3	4	4	3	2	4	4	2	2	2	2	3	2	4	2	3	3	2	3	2	4	2	4	4	4	2	4	2	4	3
320	2	3	3	2	4	4	4	4	2	2	4	5	5	5	5	2	3	3	4	4	4	2	4	4	2	2	2	4	4	2	2	3	4	4	2	4	4	2	4	3	4	4	3	4	4	4
321	3	3	2	4	3	4	4	2	3	2	4	3	3	3	4	4	4	4	4	4	4	2	4	3	4	2	2	4	2	4	3	3	4	4	4	3	4	3	3	2	2	3	3	4	3	4
322	4	3	2	4	4	4	3	4	2	3	2	5	5	5	5	2	3	4	4	3	2	4	2	2	2	2	4	4	3	2	4	3	2	2	2	3	4	4	2	4	4	3	4	3	2	3
323	4	2	4	4	4	4	3	4	2	4	4	3	2	3	3	4	2	4	2	2	5	5	5	5	5	5	5	5	5	5	5	5	5	5	2	2	2	2	2	2	2	2	2	2	2	2
324	4	2	2	3	3	5	5	5	5	5	5	4	3	4	2	2	4	3	4	2	2	2	4	2	3	2	2	3	2	2	3	4	2	3	4	2	2	2	4	4	3	4	2	2	3	3
325	2	3	4	2	4	2	3	4	3	4	4	4	4	2	3	4	2	4	3	3	4	3	2	2	4	3	4	2	3	2	2	3	3	2	4	2	3	3	2	3	2	4	4	2	2	4
326	2	2	4	4	3	3	3	3	2	2	4	3	2	2	2	3	3	3	3	4	4	2	4	3	4	3	2	2	2	4	3	2	2	3	5	5	5	5	3	3	4	2	2	2	3	3
327	3	3	2	2	3	2	3	3	3	2	3	2	2	2	2	2	2	2	2	2	5	3	4	4	3	5	3	5	5	4	4	5	3	3	3	1	3	3	3	3	1	3	2	1	1	2
328	1	1	1	1	1	4	4	5	5	4	4	4	4	3	4	4	5	4	5	3	1	2	3	2	2	1	2	1	2	2	2	3	3	1	3	3	5	4	4	3	3	5	5	5	5	4
329	5	3	5	4	4	3	5	5	5	5	4	5	3	4	5	3	4	4	3	4	5	5	5	5	5	5	5	5	5	5	5	5	5	5	4	5	3	3	3	5	5	4	5	4	3	5
330	3	5	4	5	5	3	5	3	5	3	3	4	3	5	5	5	3	3	5	3	3	2	3	2	1	2	3	2	3	3	2	2	3	1	4	5	5	5	5	5	5	5	3	3	4	4
331	3	2	2	3	4	2	3	2	3	3	4	4	3	4	4	4	3	2	3	2	2	3	4	3	2	4	2	4	3	2	3	2	4	4	3	3	2	4	2	3	4	4	4	4	4	4
332	4	4	2	3	4	3	4	2	2	3	2	3	2	3	2	2	2	4	3	2	3	2	4	3	3	2	3	3	3	4	4	2	2	4	5	5	5	5	4	4	4	4	3	4	4	3
333	4	4	3	4	4	2	3	3	3	2	2	3	2	4	4	4	4	2	4	3	2	4	2	4	3	4	3	2	2	4	2	3	3	4	4	3	2	2	4	4	4	2	5	5	5	5
334	2	2	2	2	2	2	2	2	2	2	2	2	2	2	2	2	2	2	2	2	4	4	4	4	4	4	4	4	4	4	4	4	4	4	2	2	2	2	2	2	2	2	1	1	1	1
335	4	2	3	4	4	3	2	4	3	2	2	5	5	5	5	4	4	4	3	4	4	2	2	4	3	2	4	4	2	2	3	2	3	3	2	4	3	2	3	4	4	2	4	3	3	4
336	1	1	1	1	1	3	3	4	4	3	5	3	5	5	4	3	3	3	5	4	3	1	3	3	2	1	3	3	3	3	2	1	1	2	4	5	3	5	5	5	5	4	4	3	5	5
337	1	1	1	1	1	5	4	4	5	3	3	4	5	5	3	4	4	5	3	3	1	2	2	3	1	3	3	2	3	1	1	1	2	1	3	5	4	3	3	3	5	5	5	3	4	5
338	4	2	4	4	2	2	2	4	3	4	3	4	3	2	4	5	5	5	5	5	2	3	3	4	2	3	3	2	4	2	4	4	3	4	4	2	2	2	3	3	3	2	4	3	3	4
339	2	4	2	4	2	5	5	5	5	5	5	4	4	3	2	2	3	2	2	4	4	3	4	2	4	3	2	3	3	3	4	3	4	4	3	3	4	3	2	3	4	4	4	2	4	4
340	3	3	3	1	2	1	1	2	1	3	2	2	2	2	2	2	2	2	2	2	3	5	4	5	5	4	5	5	4	5	4	4	3	5	3	3	3	1	2	1	1	3	3	2	2	3
341	2	3	4	3	3	4	3	3	3	3	2	3	3	3	2	4	3	4	2	2	1	1	1	1	1	1	1	1	1	1	1	1	1	1	2	2	3	3	4	2	4	2	4	3	4	3
342	5	4	5	4	5	4	5	3	3	3	3	5	3	5	5	4	5	5	3	5	1	1	3	3	2	3	1	2	3	2	1	3	3	3	1	1	1	1	4	5	5	4	5	3	3	4
343	3	4	4	4	5	4	3	5	3	4	5	4	3	3	5	1	1	1	1	1	2	3	2	3	3	2	1	1	2	1	1	2	2	2	3	5	3	5	4	4	5	4	4	3	5	4
344	3	3	3	4	3	4	2	3	4	4	3	5	5	5	5	2	4	2	4	2	4	4	2	2	2	4	2	4	2	2	2	4	3	3	4	3	3	3	4	4	4	2	3	3	4	2
345	2	4	3	4	2	2	2	2	3	4	2	3	4	3	3	2	4	3	2	4	4	3	2	3	3	3	2	2	2	2	2	4	2	2	5	5	5	5	3	3	4	4	4	4	4	4
346	2	4	3	4	4	4	3	4	4	4	2	4	4	4	3	3	4	2	4	4	4	2	4	2	2	2	4	2	4	3	3	3	2	2	4	3	2	3	5	5	5	5	4	2	3	3
347	3	5	5	5	4	1	1	1	1	1	1	4	4	5	4	3	3	4	3	3	1	3	3	2	2	3	1	3	2	3	3	2	1	1	4	5	5	5	3	5	5	3	3	3	3	4
348	3	3	3	4	2	4	3	4	3	4	4	2	3	4	2	2	2	4	2	3	3	2	3	3	3	3	4	4	3	3	2	2	2	4	2	3	3	4	5	5	5	5	3	4	4	2
349	5	3	5	4	4	5	4	3	3	5	3	5	4	5	3	4	4	5	4	4	3	1	3	3	3	3	2	1	2	2	2	2	1	2	3	4	5	3	3	3	3	4	5	5	5	5
350	1	1	3	1	2	3	2	2	2	1	1	1	2	1	3	1	3	3	3	3	4	4	3	4	5	5	3	3	5	4	3	4	5	4	1	3	1	3	1	3	3	3	2	2	2	2
351	3	3	5	3	3	3	3	4	5	5	4	1	1	1	1	4	3	4	3	5	1	1	3	2	1	1	1	1	1	2	2	3	1	1	3	3	3	4	3	5	3	3	3	4	3	5
352	3	2	3	2	3	4	4	3	4	4	4	4	3	4	3	2	3	2	2	3	5	5	5	5	5	5	5	5	5	5	5	5	5	5	2	2	2	2	2	2	2	2	2	2	2	2
353	2	2	4	4	2	4	3	2	4	2	4	4	2	4	2	2	4	2	3	3	2	2	4	3	2	4	4	4	4	3	3	3	2	3	4	4	2	4	4	4	3	2	2	2	4	2
354	4	2	2	2	4	3	4	3	4	4	2	4	3	4	4	4	4	4	3	4	3	2	2	4	2	4	2	2	3	4	2	3	3	4	4	4	4	4	2	2	4	4	4	2	2	4
355	3	4	5	4	4	4	4	4	3	3	3	4	3	5	3	4	4	5	4	4	2	2	3	2	1	1	1	3	1	2	1	1	2	2	1	1	1	1	3	3	3	5	3	5	3	5
356	4	4	3	2	4	3	4	4	2	4	4	3	3	4	4	2	4	4	4	3	2	3	3	2	3	4	2	3	3	2	2	4	2	2	2	2	4	4	4	3	4	2	5	5	5	5
357	2	2	2	2	2	2	2	2	2	2	2	2	2	2	2	2	2	2	2	2	4	4	4	4	4	4	4	4	4	4	4	4	4	4	2	2	2	2	2	2	2	2	1	1	1	1
358	4	3	3	4	5	5	3	3	4	4	3	4	3	5	5	4	5	5	4	3	2	3	2	2	2	1	2	1	2	2	1	2	2	1	3	5	3	3	4	3	4	3	1	1	1	1
359	4	4	4	4	5	3	4	3	5	3	3	5	5	5	4	3	4	3	5	3	2	2	1	2	3	2	2	1	2	1	2	3	2	3	3	3	5	5	1	1	1	1	4	5	4	3
360	2	2	3	4	4	4	4	2	3	4	3	2	4	3	4	3	2	4	2	3	2	3	2	3	2	2	4	4	3	2	2	2	2	2	4	4	2	4	3	2	3	2	4	2	2	2
361	2	2	2	2	2	2	2	2	2	2	2	2	2	2	2	2	2	2	2	2	4	4	4	4	4	4	4	4	4	4	4	4	4	4	1	1	1	1	2	2	2	2	2	2	2	2
362	3	5	3	5	4	5	5	3	4	3	4	5	5	3	5	1	1	1	1	1	1	1	3	1	1	2	3	3	3	2	3	1	1	1	5	5	3	5	4	4	3	5	5	3	3	3
363	2	4	4	3	4	3	4	3	4	2	2	2	2	3	3	4	2	2	2	4	3	4	3	2	3	2	3	2	4	4	2	3	4	3	5	5	5	5	2	2	2	4	2	2	4	3
364	4	4	4	3	4	4	2	2	4	4	3	2	2	3	4	4	3	2	2	4	5	5	5	5	5	5	5	5	5	5	5	5	5	5	2	2	2	2	2	2	2	2	2	2	2	2
365	3	3	4	3	3	4	4	5	3	5	5	4	3	5	3	5	5	5	5	5	3	2	1	1	3	2	2	1	3	2	3	2	1	1	5	5	5	3	5	4	4	5	5	5	3	5
366	2	4	4	2	3	4	4	3	4	2	2	3	2	4	2	4	2	3	3	4	2	3	2	4	3	3	3	2	2	4	2	2	3	2	5	5	5	5	2	4	4	4	4	2	4	2
367	1	1	1	1	1	3	3	4	3	5	3	5	5	3	3	5	4	5	5	4	2	1	1	2	1	3	2	3	1	2	1	1	1	3	5	3	3	3	4	3	4	3	3	3	3	3
368	4	5	5	3	3	4	3	5	4	5	4	3	3	5	3	5	3	5	5	3	5	5	5	5	5	5	5	5	5	5	5	5	5	5	5	4	5	5	5	3	4	4	4	5	3	4
369	4	3	4	3	4	4	2	2	4	2	2	2	2	2	2	4	2	4	2	4	4	3	3	3	4	4	2	3	2	3	3	4	2	2	2	4	2	4	3	4	2	4	3	3	2	4
370	3	3	4	3	4	4	2	2	2	3	2	4	2	3	4	4	2	4	2	3	3	2	2	2	3	4	4	4	2	2	2	4	4	4	4	2	3	4	2	4	3	3	4	2	4	3
371	1	1	1	1	1	5	5	3	4	4	4	3	4	3	5	3	3	5	4	3	3	1	3	1	1	1	3	2	1	1	2	3	1	2	5	3	4	4	5	5	5	4	5	4	4	4
372	4	3	3	2	4	2	4	3	2	4	4	2	2	2	2	4	2	2	4	4	2	3	3	3	3	3	3	2	3	2	2	4	3	2	2	4	4	3	2	2	2	2	2	4	4	4
373	3	2	4	4	4	4	4	2	2	4	4	4	2	2	4	2	3	4	4	2	2	2	4	4	3	3	4	4	4	4	3	4	2	4	3	3	2	2	4	2	3	4	4	3	3	3
374	2	3	2	4	2	4	2	3	4	4	3	4	2	4	4	5	5	5	5	5	4	4	4	2	4	3	3	4	4	3	2	4	2	2	2	4	2	3	3	3	4	2	3	2	3	4
375	3	3	4	3	3	4	5	5	3	3	4	5	3	3	5	4	5	3	4	5	2	3	1	2	1	3	3	1	3	2	3	1	2	1	4	4	3	3	1	1	1	1	4	3	3	5
376	4	5	4	4	3	5	3	3	5	3	5	5	4	3	4	4	3	3	4	5	1	3	3	3	3	2	3	3	1	3	3	1	3	2	5	4	5	5	5	5	5	5	4	4	3	3
377	4	3	4	4	4	4	4	4	3	4	4	2	3	4	3	4	2	3	2	4	4	2	2	3	4	4	3	4	2	2	2	2	4	3	3	3	3	3	3	2	3	2	2	3	3	4
378	2	2	4	4	3	2	4	3	4	2	4	3	2	3	4	2	4	3	2	4	3	2	4	3	4	3	3	4	3	2	3	3	3	2	4	2	3	3	3	4	2	4	5	5	5	5
379	2	1	2	1	3	1	1	2	2	2	1	2	2	2	2	2	1	1	1	3	4	5	4	4	4	3	4	3	4	3	5	4	3	5	3	1	3	3	1	2	2	3	3	2	3	3
380	5	5	5	5	5	2	4	4	3	4	4	4	2	4	4	4	2	4	2	2	3	4	4	4	4	3	2	4	4	4	4	4	2	4	4	3	2	3	3	2	2	4	4	2	4	2
381	2	4	2	3	4	3	4	4	2	2	2	2	2	3	4	2	2	3	3	4	5	5	5	5	5	5	5	5	5	5	5	5	5	5	2	2	2	2	2	2	2	2	2	2	2	2
382	4	2	2	4	2	3	2	4	2	4	4	4	3	2	3	3	3	3	4	2	3	2	4	2	3	3	3	3	2	4	4	3	2	2	2	4	4	4	4	4	4	3	5	5	5	5
383	3	4	4	4	2	5	5	5	5	5	5	4	2	4	3	2	4	4	3	2	4	4	3	2	3	3	2	4	3	3	4	4	2	2	3	2	2	3	4	4	4	4	4	4	2	4
384	5	5	3	5	4	4	3	4	4	5	4	4	4	5	3	4	3	4	3	4	5	5	5	5	5	5	5	5	5	5	5	5	5	5	4	4	5	3	3	4	4	3	3	4	4	3
385	5	5	5	5	5	3	2	4	2	2	4	4	3	2	3	3	3	2	4	4	2	4	4	2	2	3	3	4	2	3	2	2	2	4	2	2	4	4	4	4	2	4	4	3	4	2
386	4	4	3	4	4	3	4	2	3	2	4	4	3	4	2	2	4	3	4	2	3	2	2	2	2	4	2	2	2	4	3	4	2	2	5	5	5	5	4	4	3	2	3	2	3	2
387	1	1	1	1	1	3	2	2	2	4	4	2	3	2	4	4	2	4	2	4	2	2	4	4	2	2	4	2	2	3	4	4	2	4	3	4	2	4	3	3	4	2	4	3	3	3
388	5	5	5	5	5	5	4	3	3	3	4	3	4	5	4	4	3	4	3	4	3	2	3	1	2	1	3	1	1	3	2	2	3	3	3	4	5	5	4	3	3	4	5	4	3	3
389	3	3	3	3	1	2	3	2	1	2	1	1	1	1	1	1	3	2	1	3	5	4	3	5	3	4	3	3	5	5	5	4	3	4	3	3	1	1	2	2	2	2	1	1	3	2
390	2	3	4	3	4	1	1	1	1	1	1	4	3	2	4	4	3	4	4	3	3	4	3	4	3	4	3	4	2	3	3	3	2	2	3	3	4	3	2	4	2	2	2	4	3	2
391	3	4	4	2	3	3	4	2	4	4	3	2	4	3	3	2	3	3	2	3	2	3	4	2	4	2	2	2	2	3	2	3	4	2	3	2	2	3	3	4	4	4	2	2	2	2
392	3	4	2	2	2	5	5	5	5	5	5	3	3	4	3	3	4	2	2	4	3	3	4	4	4	4	3	3	4	2	2	4	3	2	3	3	3	3	2	2	3	4	2	4	4	4
393	3	3	3	2	3	3	4	3	2	4	3	4	3	2	3	4	3	4	2	4	4	4	2	4	4	3	2	3	2	2	3	4	3	4	4	4	2	3	3	4	3	3	2	2	4	3
394	4	2	3	2	2	5	5	5	5	5	5	4	4	2	2	4	4	2	3	2	3	2	2	3	3	2	3	2	3	2	4	2	2	3	3	4	4	4	4	3	4	2	4	3	3	2
395	4	5	4	3	4	3	4	3	4	5	3	1	1	1	1	5	5	3	3	3	3	3	3	3	2	1	2	1	3	1	1	1	1	3	3	3	3	3	5	4	4	3	3	3	4	4
396	3	4	3	3	2	4	3	3	4	4	4	2	3	2	2	2	3	2	4	4	2	2	4	3	4	4	4	2	3	2	4	4	2	2	4	2	2	4	4	4	4	4	3	4	4	4
397	5	5	5	5	5	2	3	2	4	3	2	4	3	3	4	4	3	2	4	3	2	3	4	2	4	2	3	2	2	4	3	2	2	2	2	3	4	2	3	4	3	4	4	2	4	4
398	2	2	2	2	2	2	2	2	2	2	2	2	2	2	2	2	2	2	2	2	4	4	4	4	4	4	4	4	4	4	4	4	4	4	2	2	2	2	2	2	2	2	4	4	2	3
399	3	2	3	3	2	3	3	3	4	4	4	3	3	4	4	2	2	3	4	4	2	2	3	2	3	4	3	4	4	2	2	4	3	3	2	4	2	3	4	3	4	4	4	2	4	2
400	3	2	2	4	4	2	3	2	4	3	2	4	3	4	2	3	3	2	2	2	5	5	5	5	5	5	5	5	5	5	5	5	5	5	2	2	2	2	2	2	2	2	2	2	2	2
401	4	4	3	4	2	2	4	4	2	2	2	3	2	3	3	2	3	4	4	3	2	2	2	3	4	2	3	4	2	2	3	4	2	2	3	3	3	4	3	2	4	3	3	4	4	4
402	3	2	4	2	3	4	3	2	4	2	4	3	4	3	3	3	3	3	4	4	4	4	2	2	3	2	3	4	3	4	2	4	3	4	4	4	3	3	2	3	4	3	3	3	3	4
403	5	5	5	5	5	4	4	3	4	3	3	4	3	3	4	4	4	3	3	4	3	2	3	2	4	4	3	2	4	3	2	2	4	4	4	4	2	2	4	3	4	2	2	4	4	3
404	4	2	3	3	2	2	3	4	3	4	2	4	4	2	3	2	4	2	2	4	3	2	3	2	4	2	3	4	2	2	2	2	3	2	4	3	4	4	4	4	3	4	4	2	4	4
405	4	4	4	2	4	4	4	2	2	3	2	4	3	4	2	3	3	3	3	2	3	3	2	3	3	4	2	2	2	2	3	4	2	4	5	5	5	5	4	3	4	4	4	4	4	2
406	2	3	2	4	2	4	4	4	3	2	3	3	4	4	3	2	3	3	4	4	2	4	3	3	2	2	3	2	4	2	3	4	3	4	3	2	3	4	3	3	2	4	4	4	3	4
407	1	1	1	1	1	5	4	4	4	4	3	5	3	3	4	4	3	3	3	3	3	3	1	1	3	1	2	2	2	3	2	2	3	1	4	5	4	3	5	5	3	5	3	3	4	3
408	2	4	4	2	2	3	4	3	2	2	2	2	4	2	4	3	3	4	2	4	4	2	3	2	4	3	3	3	4	3	2	3	2	2	4	4	4	2	2	2	4	4	2	4	2	2
409	4	4	3	4	5	5	4	4	5	4	4	5	4	5	5	5	3	4	5	4	1	3	3	1	1	2	2	3	3	2	1	2	3	3	4	4	5	3	1	1	1	1	4	5	4	3
410	4	3	4	5	5	4	4	5	5	5	3	1	1	1	1	4	4	3	4	5	2	3	1	2	3	3	3	3	3	1	3	1	2	3	4	3	5	4	5	4	4	5	4	3	5	3
411	3	3	4	4	4	3	4	4	4	3	5	5	4	3	3	5	5	5	5	4	1	3	3	2	1	3	1	2	2	2	1	1	3	1	5	5	5	5	4	5	5	3	3	3	4	3
412	2	2	3	4	2	3	4	2	2	2	3	2	2	3	3	3	4	4	2	2	3	2	2	2	3	2	2	3	4	4	2	2	3	3	5	5	5	5	2	2	3	2	2	4	2	3
413	3	4	4	4	4	2	2	3	4	2	4	3	2	3	4	3	4	4	3	4	3	2	2	2	4	3	3	3	3	2	4	4	4	2	4	2	3	4	4	4	2	3	3	3	2	4
414	4	3	5	5	3	4	3	3	3	5	5	3	4	5	3	3	4	3	3	3	5	5	5	5	5	5	5	5	5	5	5	5	5	5	5	4	5	4	4	5	5	3	5	5	3	4
415	4	3	5	5	4	5	5	4	5	3	4	5	4	3	4	3	5	4	5	4	1	1	2	2	3	3	3	3	1	3	2	3	2	2	1	1	1	1	4	3	5	4	5	5	4	3
416	4	4	3	3	4	4	4	4	3	3	2	3	2	2	2	2	3	4	2	3	2	2	4	3	3	3	2	2	2	3	2	4	3	3	5	5	5	5	3	2	2	4	2	2	4	2
417	4	4	3	3	2	2	2	4	2	2	4	4	3	3	3	3	4	3	3	2	3	2	2	3	2	4	2	2	4	4	2	2	2	4	3	2	3	2	2	4	4	3	4	2	3	4
418	2	3	3	3	3	2	2	3	2	1	2	1	1	2	3	2	3	1	3	3	3	5	5	4	3	4	4	3	5	4	5	4	4	5	2	3	1	2	2	2	2	2	1	2	2	2
419	3	4	2	2	3	4	2	3	3	2	3	3	3	3	3	4	2	4	4	4	4	4	2	3	2	3	3	2	2	2	3	3	2	2	2	2	2	2	4	3	3	4	2	2	2	3
420	3	4	3	4	2	4	4	4	4	2	2	5	5	5	5	3	4	3	2	3	2	2	2	3	3	4	2	2	2	4	3	2	3	2	4	4	4	3	3	3	3	2	2	2	4	2
421	2	4	4	2	4	4	2	3	4	3	4	4	4	2	4	3	4	2	3	4	4	2	2	3	3	2	3	2	4	4	4	2	2	4	4	2	3	3	4	2	3	2	4	4	4	3
422	5	5	5	4	3	5	3	3	5	4	3	4	4	3	3	5	5	5	3	4	1	2	2	1	3	2	3	1	1	3	3	3	3	2	1	1	1	1	3	4	3	5	5	5	4	4
423	4	5	5	4	4	3	3	3	4	4	5	1	1	1	1	5	5	4	5	5	3	2	2	3	1	3	1	1	1	3	3	1	1	3	4	3	4	4	3	5	3	3	3	4	5	3
424	3	3	3	4	3	3	4	2	4	3	2	4	3	2	2	4	4	3	4	2	3	4	2	4	4	4	2	3	4	2	4	3	2	2	4	3	4	4	5	5	5	5	2	4	3	2
425	1	1	1	1	1	3	4	3	4	3	3	4	3	3	3	5	4	3	3	5	1	1	3	2	3	2	2	2	3	3	2	3	1	2	4	5	5	3	5	5	5	3	3	5	4	5
426	1	2	2	3	2	3	2	1	3	1	2	2	1	1	2	2	3	3	3	1	4	4	5	5	5	3	3	5	5	3	5	5	3	3	2	2	2	2	1	1	1	3	1	3	1	3
427	2	2	2	4	4	5	5	5	5	5	5	3	3	3	4	4	3	3	4	2	2	2	2	4	3	2	4	2	4	3	3	2	2	2	2	2	4	4	4	4	3	4	3	3	3	2
428	2	2	4	2	4	5	5	5	5	5	5	4	2	3	4	3	3	4	4	2	2	4	4	3	4	2	2	2	2	2	3	4	4	2	2	4	2	3	3	3	3	2	4	4	2	2
429	4	2	2	2	4	2	3	2	2	2	4	1	1	1	1	4	3	3	3	4	2	4	2	3	3	4	4	4	3	3	2	2	3	3	2	4	3	2	3	2	3	4	4	3	2	3
430	3	3	4	3	4	3	3	5	5	5	5	3	4	4	3	5	5	5	5	5	2	1	3	2	3	3	3	1	1	3	1	3	2	1	4	3	3	3	4	4	5	4	5	5	5	3
431	2	2	3	3	2	3	2	3	2	4	4	4	4	4	3	3	2	3	4	2	5	5	5	5	5	5	5	5	5	5	5	5	5	5	2	2	2	2	2	2	2	2	2	2	2	2
432	3	3	2	2	4	4	2	3	4	4	4	3	2	3	4	3	2	4	4	2	4	3	4	2	3	3	4	4	3	2	3	2	4	2	4	4	3	4	3	4	4	4	3	3	2	2
433	4	2	4	2	4	5	5	5	5	5	5	3	4	4	3	2	2	2	2	4	4	2	2	2	2	4	3	4	2	4	2	3	3	3	4	4	2	4	3	4	2	4	3	2	3	3
434	3	3	4	4	2	4	2	4	4	2	3	3	3	4	2	3	3	3	3	4	2	3	3	4	2	3	4	4	3	2	2	3	3	4	3	2	4	2	2	4	3	4	2	4	2	2
435	3	2	4	4	2	2	4	4	3	2	4	4	2	4	3	4	3	4	4	2	2	2	4	3	4	4	3	2	2	3	3	2	3	4	3	2	3	4	2	2	4	3	5	5	5	5
436	4	4	4	5	3	5	4	3	5	3	4	1	1	1	1	5	4	4	3	5	1	1	2	2	2	2	1	3	2	2	3	2	1	2	3	3	5	5	5	5	4	3	5	4	3	4
437	4	3	2	3	3	2	4	4	4	3	3	3	3	4	2	1	1	1	1	1	4	3	2	2	2	2	2	2	3	3	2	3	2	4	4	4	4	3	4	3	4	4	4	3	2	3
438	4	4	3	5	4	4	5	5	4	4	5	3	5	4	5	4	4	5	3	4	3	1	3	1	2	2	2	1	3	1	1	3	1	1	1	1	1	1	4	5	4	3	5	3	5	3
439	2	2	2	2	2	3	1	1	1	2	3	1	3	2	3	1	1	2	2	3	3	5	3	3	4	4	4	5	3	4	5	5	5	3	3	2	2	2	2	1	3	1	3	1	2	2
440	2	3	3	4	3	1	1	1	1	1	1	4	4	2	4	3	4	2	2	4	4	3	4	2	3	4	3	2	2	4	3	2	4	3	3	4	4	3	3	3	2	2	2	3	2	4
441	2	3	4	2	2	4	3	3	3	3	2	4	2	3	4	4	4	4	4	3	4	2	3	3	4	2	3	3	2	3	2	2	2	4	3	2	3	4	4	3	3	2	4	2	3	2
442	4	3	4	5	3	3	3	3	3	4	5	5	3	4	3	1	1	1	1	1	3	2	3	2	1	1	1	1	2	3	3	3	2	3	3	3	5	3	3	4	4	4	4	4	4	4
443	5	5	5	4	5	1	1	1	1	1	1	4	3	4	4	4	5	4	4	3	3	2	2	3	3	3	1	1	1	2	1	1	3	3	3	3	3	4	5	5	4	3	5	5	4	5
444	4	2	2	3	2	4	2	4	2	4	4	4	4	2	2	4	4	2	4	2	2	3	4	3	2	3	2	2	4	4	4	2	4	2	4	4	4	4	2	2	4	4	3	4	3	3
445	4	2	2	4	4	3	2	3	2	2	2	5	5	5	5	2	3	4	2	3	3	3	4	3	3	2	4	2	2	2	2	3	4	4	4	4	4	2	2	2	4	2	4	3	4	4
446	5	4	3	4	4	5	3	3	5	3	3	4	4	4	5	4	3	3	3	4	1	1	2	2	1	2	1	2	2	2	1	3	1	3	5	5	5	5	4	3	5	3	5	5	3	3
447	4	4	4	3	4	4	4	2	4	4	4	2	4	3	4	4	2	4	2	4	4	2	3	3	4	2	4	3	3	2	2	2	2	4	3	2	2	2	4	3	3	3	4	3	3	4
448	3	3	4	2	2	3	3	4	2	4	4	2	3	4	2	2	4	4	3	2	5	5	5	5	5	5	5	5	5	5	5	5	5	5	2	2	2	2	2	2	2	2	2	2	2	2
449	5	5	4	3	4	5	3	5	5	4	4	5	5	5	5	3	3	5	4	4	3	3	1	1	1	3	3	1	1	2	3	1	1	3	3	4	5	5	4	5	4	5	3	5	4	5
450	4	3	3	2	4	2	4	3	3	3	3	3	4	3	4	3	2	4	2	4	3	3	3	4	4	2	4	3	2	2	3	4	3	2	4	3	4	2	2	3	2	4	5	5	5	5
451	4	4	4	4	3	5	5	5	5	5	5	4	2	4	4	3	4	2	4	4	2	2	3	3	4	4	2	2	2	4	2	3	3	2	3	4	2	4	3	2	3	4	4	4	4	4
452	1	1	2	3	3	1	3	2	3	2	3	1	1	3	3	3	3	1	1	2	4	4	4	4	4	4	4	4	4	4	4	4	4	4	2	1	2	2	3	1	2	2	3	1	2	2
453	2	4	2	4	4	4	3	2	4	2	3	2	4	4	4	4	2	2	2	4	3	2	3	4	2	4	3	2	4	2	2	2	2	3	3	3	2	4	4	2	2	2	4	2	3	4
454	2	2	2	3	4	5	5	5	5	5	5	4	4	3	4	4	3	4	3	2	4	2	3	3	3	4	2	3	4	2	4	2	2	3	4	4	3	4	4	2	3	4	3	4	4	4
455	3	3	3	3	3	3	4	5	3	4	5	5	3	3	5	5	5	3	4	3	5	5	5	5	5	5	5	5	5	5	5	5	5	5	4	4	5	4	5	5	5	5	5	4	3	5
456	4	2	2	3	3	3	4	4	4	3	4	4	2	4	3	4	2	3	2	2	1	1	1	1	1	1	1	1	1	1	1	1	1	1	2	2	3	4	2	4	4	2	3	3	4	3
457	3	2	4	3	3	2	4	3	4	4	2	3	3	2	4	3	3	2	3	2	1	1	1	1	1	1	1	1	1	1	1	1	1	1	2	4	2	2	4	2	2	2	2	4	4	4
458	4	2	4	3	2	3	4	2	2	3	4	4	2	3	3	2	2	4	4	2	2	4	2	2	2	4	2	4	2	4	4	2	4	2	4	2	3	2	4	3	2	4	3	4	3	3
459	4	5	3	4	4	4	3	5	5	4	3	5	5	5	5	3	4	5	5	3	3	2	1	2	3	1	3	3	1	3	2	1	2	3	3	5	4	4	4	3	5	4	5	3	4	5
460	1	1	1	1	1	4	3	4	4	4	5	4	4	3	5	4	3	5	5	3	2	2	2	1	2	2	1	3	3	2	3	2	3	2	4	5	3	4	5	4	5	5	3	3	4	3
461	5	3	3	5	4	5	5	5	5	5	5	4	3	5	4	5	3	3	4	5	1	3	1	3	1	2	1	2	3	3	2	1	2	3	5	5	4	4	4	5	3	4	4	5	4	4
462	1	1	1	1	1	3	4	3	5	5	5	3	4	3	4	3	4	4	4	4	2	3	1	2	3	1	3	3	1	3	3	3	2	2	4	3	3	3	3	3	5	4	4	5	4	3
463	4	3	3	3	4	5	3	3	4	5	3	3	4	3	4	4	4	5	5	4	2	2	1	3	1	3	3	2	3	2	1	3	2	1	1	1	1	1	3	5	3	5	3	3	3	4
464	4	2	4	4	4	2	2	4	3	3	3	4	4	2	4	5	5	5	5	5	3	2	4	3	2	2	2	2	4	3	2	4	3	2	4	4	3	3	3	2	2	3	3	4	3	4
465	2	2	2	2	2	2	2	2	2	2	2	2	2	2	2	2	2	2	2	2	4	4	4	4	4	4	4	4	4	4	4	4	4	4	2	2	2	2	2	2	2	2	1	1	1	1
466	2	2	2	4	3	4	2	4	4	3	2	5	5	5	5	2	3	4	2	2	2	2	2	4	4	2	2	3	4	3	4	3	2	2	4	3	4	2	3	2	4	2	4	3	4	3
467	1	1	1	1	1	2	2	4	4	3	3	2	3	3	2	3	2	4	2	4	2	4	4	2	3	2	4	2	2	3	2	2	2	2	4	2	2	4	3	4	3	2	2	3	2	4
468	2	3	3	4	4	4	4	4	3	3	3	4	2	2	2	4	4	2	4	3	3	2	2	2	4	3	3	2	4	3	3	3	2	3	2	3	2	2	5	5	5	5	4	2	2	2
469	4	4	3	5	4	4	3	5	3	4	3	3	3	4	4	4	5	5	3	4	3	2	2	2	1	1	3	1	2	3	1	2	3	2	1	1	1	1	5	3	4	5	5	5	5	5
470	4	2	2	4	4	5	5	5	5	5	5	3	2	3	4	4	2	4	3	2	2	3	2	4	2	2	3	3	2	3	3	3	4	3	4	4	4	4	2	4	2	3	3	4	2	2
471	3	3	3	5	3	4	4	3	4	3	5	3	5	3	5	1	1	1	1	1	3	1	1	1	2	1	1	3	2	1	3	3	1	3	5	4	3	3	4	3	5	5	4	4	4	5
472	3	4	3	3	3	3	3	4	5	5	3	3	4	3	3	4	3	5	4	5	3	3	3	1	3	1	2	2	3	3	1	1	1	3	5	4	5	4	3	3	4	4	1	1	1	1
473	5	3	5	3	4	3	4	3	5	5	5	5	5	4	5	1	1	1	1	1	3	3	2	2	3	3	1	1	3	2	3	1	3	2	3	3	3	4	5	5	5	5	5	5	5	5
474	4	4	2	2	3	2	2	3	3	4	2	4	3	2	4	4	2	4	4	4	1	1	1	1	1	1	1	1	1	1	1	1	1	1	4	2	4	2	3	4	4	4	4	4	4	2
475	1	1	3	2	2	1	2	2	2	2	2	2	2	2	2	2	2	3	2	1	5	5	3	3	3	3	5	3	5	3	4	3	3	5	1	1	3	1	3	2	1	2	3	1	2	1
476	4	2	2	3	4	3	3	3	4	4	4	3	4	4	4	5	5	5	5	5	2	3	3	4	2	4	3	2	2	4	2	3	2	4	3	4	4	4	2	4	4	2	4	4	4	2
477	3	4	5	4	5	4	4	5	3	4	5	2	2	2	2	5	3	5	3	5	2	3	1	1	3	3	3	2	3	2	3	3	2	2	4	3	4	4	1	1	1	1	5	5	5	4
478	4	5	4	4	5	4	3	4	3	4	4	2	2	2	2	4	5	3	5	3	3	1	2	1	1	1	1	1	2	3	1	1	3	2	4	5	4	5	1	1	1	1	4	4	3	3
479	2	2	2	3	2	4	4	2	4	4	3	2	2	4	4	3	4	2	4	2	1	1	1	1	1	1	1	1	1	1	1	1	1	1	4	3	4	3	4	3	2	3	3	2	3	4
480	1	1	1	1	1	3	2	4	3	4	3	4	4	2	2	4	4	4	2	4	3	2	2	2	3	4	4	3	3	3	4	2	3	4	4	3	3	4	4	4	3	4	3	3	3	2
481	5	5	4	5	3	5	3	3	4	5	3	4	3	3	5	5	4	3	3	5	3	3	1	3	2	3	2	2	1	2	1	3	2	3	3	3	5	3	5	4	3	5	1	1	1	1
482	2	2	4	3	2	3	3	3	4	3	3	2	4	2	3	4	2	3	4	4	4	2	2	4	4	3	4	2	4	3	2	3	4	2	3	4	2	4	4	3	3	4	3	2	4	2
483	3	4	2	4	4	5	5	5	5	5	5	3	2	4	2	3	2	2	4	3	4	2	4	4	2	3	4	3	3	4	4	4	3	3	3	4	3	4	4	4	4	4	2	2	3	3
484	5	5	4	3	5	3	3	4	3	4	3	3	3	3	3	4	4	3	3	5	1	2	1	1	2	2	1	2	3	2	1	3	1	3	1	1	1	1	3	4	5	3	3	4	4	3
485	1	3	2	2	1	1	3	3	2	2	1	2	2	3	3	2	2	2	2	2	3	4	3	5	5	4	4	3	4	4	5	5	3	3	2	2	1	1	2	3	3	2	2	2	1	3
486	5	4	3	3	3	3	3	3	5	3	5	1	1	1	1	4	5	3	5	4	3	1	1	1	2	2	2	2	1	3	2	3	2	1	3	4	5	5	3	5	5	3	3	4	3	4
487	5	5	5	5	5	2	3	2	2	4	4	3	3	3	2	2	3	2	3	2	3	3	3	2	3	4	4	4	2	3	3	4	2	4	3	4	4	4	2	4	2	3	4	4	4	4
488	4	4	3	4	4	3	4	4	3	4	4	2	2	3	4	2	3	4	4	2	4	4	4	3	2	2	2	2	4	2	2	4	2	2	2	3	2	2	4	2	4	2	5	5	5	5
489	2	4	4	3	3	4	4	4	2	4	4	3	2	2	2	4	2	4	3	2	3	4	4	2	3	2	2	4	3	4	3	2	4	2	2	2	3	4	2	3	4	2	4	3	4	4
490	3	3	5	3	5	4	5	5	3	3	3	1	1	1	1	4	5	4	4	5	3	3	3	1	2	2	3	3	3	1	3	2	2	3	3	5	3	5	3	3	4	4	5	5	5	5
491	4	5	3	5	4	4	5	3	3	3	3	5	5	4	4	5	5	4	5	4	2	3	3	2	2	2	1	2	2	1	1	2	2	3	3	5	5	5	5	3	5	4	5	5	5	5
492	2	3	3	2	1	2	2	2	2	2	2	1	1	1	2	3	2	3	1	1	3	5	5	4	4	5	4	3	4	5	3	3	5	5	3	2	2	3	3	3	3	2	2	3	2	1
493	4	3	5	5	4	5	5	3	5	4	5	3	5	5	5	3	5	3	3	4	2	1	3	1	2	3	1	2	3	1	3	3	1	1	5	5	4	3	3	3	3	4	1	1	1	1
494	2	3	3	2	2	4	4	3	3	2	4	3	3	2	2	3	4	4	3	3	3	2	2	4	4	2	3	3	2	3	3	4	2	2	2	2	2	4	5	5	5	5	2	3	3	3
495	3	4	3	4	5	3	4	4	5	4	5	1	1	1	1	4	5	5	4	3	3	1	3	3	1	1	1	3	3	1	2	3	2	3	3	3	4	3	5	3	5	4	4	4	5	4
496	3	4	4	4	3	5	5	5	5	5	5	4	3	3	4	3	4	4	4	3	4	4	2	3	2	3	2	2	4	2	2	3	2	2	3	3	4	2	3	4	2	2	3	4	3	4
497	5	5	5	4	4	3	3	5	4	5	4	4	4	3	3	5	4	5	4	4	2	2	2	2	3	2	2	2	2	3	3	3	3	2	1	1	1	1	5	3	5	4	5	4	3	3
498	2	2	4	3	2	3	4	2	4	2	3	2	4	3	2	3	4	3	2	4	4	3	4	3	2	3	2	4	2	4	4	4	4	2	4	2	3	3	2	4	2	4	2	4	3	4
499	4	3	4	2	4	1	1	1	1	1	1	4	2	3	3	2	2	4	4	2	2	4	2	3	3	2	2	2	2	4	4	4	3	4	4	4	3	3	2	2	2	3	4	2	4	4
500	4	5	5	3	5	5	5	3	4	5	5	4	4	4	3	3	3	3	4	4	5	5	5	5	5	5	5	5	5	5	5	5	5	5	5	5	4	5	4	3	4	5	4	5	3	3
501	2	3	4	2	3	3	2	3	4	3	4	4	4	2	3	5	5	5	5	5	3	4	2	3	2	3	3	3	2	4	2	2	3	3	3	3	3	4	2	2	2	4	2	3	2	2
502	4	5	4	5	3	3	3	3	5	3	3	5	4	4	5	4	3	5	3	3	1	3	2	1	3	2	1	3	3	1	1	1	1	2	4	3	3	3	5	5	5	5	4	4	5	3
503	3	4	2	2	4	3	4	4	4	4	4	2	4	4	3	4	3	3	2	3	1	1	1	1	1	1	1	1	1	1	1	1	1	1	4	3	4	4	4	4	4	3	3	4	2	4
504	1	2	2	2	3	1	3	2	1	2	1	3	3	2	3	3	1	1	3	2	5	5	3	4	5	4	4	3	4	5	5	4	4	3	2	2	2	2	2	1	3	3	3	1	1	2
505	3	4	2	4	4	3	2	2	4	4	3	2	2	3	4	2	3	4	2	2	1	1	1	1	1	1	1	1	1	1	1	1	1	1	2	2	4	2	2	4	2	4	2	4	2	4
506	4	2	3	4	2	4	4	2	3	3	3	4	3	2	2	2	3	2	4	3	1	1	1	1	1	1	1	1	1	1	1	1	1	1	4	2	3	3	3	4	4	4	2	3	3	2
507	2	4	2	4	3	3	2	3	4	4	4	4	3	3	4	4	3	4	3	2	4	2	2	3	4	2	3	2	3	2	4	2	2	3	2	4	4	2	3	4	3	4	5	5	5	5
508	1	3	2	3	3	2	1	2	3	1	1	3	3	1	2	3	1	3	2	1	3	4	3	4	4	3	5	5	4	3	3	3	5	3	2	2	2	2	2	3	2	2	3	2	2	2
509	3	5	3	3	4	4	4	5	5	3	4	5	4	3	3	5	5	4	3	3	3	3	2	2	3	2	2	3	1	3	1	1	2	2	1	1	1	1	3	4	5	3	3	5	3	3
510	4	2	3	4	3	2	2	3	2	2	4	4	2	2	2	4	4	4	3	4	2	2	2	3	4	3	2	4	4	2	3	2	3	2	3	4	3	4	2	2	3	3	4	4	3	4
511	5	4	5	5	5	4	5	4	5	4	4	1	1	1	1	5	5	5	5	4	1	3	3	1	2	3	1	2	3	2	3	3	1	3	3	4	5	3	3	3	5	3	3	5	3	3
512	2	2	2	4	2	4	3	3	3	4	2	1	1	1	1	3	3	2	4	3	2	3	2	3	2	3	2	4	3	4	4	3	2	2	3	4	4	4	2	4	3	2	4	4	2	2
513	3	2	1	2	2	2	2	2	2	2	2	1	2	1	1	3	2	3	3	1	3	3	3	4	4	5	5	3	5	5	5	4	4	3	2	3	3	3	2	2	3	2	3	1	1	3
514	3	4	2	4	3	4	4	4	4	4	4	4	4	4	4	5	5	5	5	5	2	4	2	3	2	2	3	4	2	2	2	2	2	2	3	2	3	2	4	2	4	4	3	4	4	4
515	5	3	4	3	3	1	1	1	1	1	1	3	5	3	3	4	3	5	4	4	3	3	2	3	2	1	1	1	2	2	3	1	3	3	4	4	3	3	3	3	3	4	5	5	3	5
516	4	2	3	4	3	2	4	4	2	4	3	2	3	4	2	3	2	4	4	3	2	3	2	2	3	3	4	4	3	2	4	2	4	4	3	3	4	2	4	4	2	3	4	3	2	3
517	5	5	3	5	4	5	3	4	4	4	5	5	5	5	4	4	3	5	5	5	1	3	2	1	3	1	2	1	2	3	3	1	1	1	5	5	5	5	4	4	3	3	3	3	4	4
518	4	2	3	2	4	3	3	4	2	4	3	2	4	4	4	5	5	5	5	5	3	3	4	2	4	2	3	3	4	2	3	2	3	2	2	4	3	4	3	4	3	3	4	4	3	3
519	1	3	3	3	2	1	1	2	2	1	1	1	2	2	3	1	3	2	1	2	3	3	3	4	5	5	5	3	3	4	5	5	4	4	3	1	2	2	2	2	2	2	3	1	3	2
520	5	4	5	3	3	5	5	5	5	3	3	5	5	3	5	3	4	3	4	5	2	3	1	3	2	3	1	1	1	3	1	2	1	2	4	5	3	5	4	4	4	4	1	1	1	1
521	3	3	4	4	4	4	3	3	2	2	3	2	3	2	4	2	2	3	4	2	1	1	1	1	1	1	1	1	1	1	1	1	1	1	4	4	4	4	2	2	3	2	3	4	4	3
522	3	3	4	3	4	5	5	5	5	5	5	2	2	2	3	3	4	3	2	2	3	2	3	2	2	3	3	3	2	3	4	2	4	4	4	3	4	2	2	4	4	3	4	3	3	4
523	3	4	5	3	5	3	4	4	3	4	4	4	5	4	4	3	3	4	3	4	5	5	5	5	5	5	5	5	5	5	5	5	5	5	3	4	4	4	4	3	4	4	4	3	5	3
524	5	5	4	5	5	4	5	3	5	3	4	5	5	4	4	5	5	4	4	3	1	3	2	3	2	1	3	2	1	3	3	2	3	1	5	3	3	3	1	1	1	1	5	3	3	3
525	3	4	5	4	3	1	1	1	1	1	1	4	4	4	4	4	3	5	5	3	3	2	3	1	1	1	3	2	3	1	3	1	2	2	5	3	3	5	4	5	3	5	5	3	5	4
526	4	2	4	2	3	4	2	3	4	3	4	4	3	2	2	2	2	2	2	3	3	4	2	3	3	2	2	4	4	2	2	2	2	3	3	4	3	4	3	3	4	2	4	3	2	3
527	1	2	2	1	3	3	2	3	2	1	3	2	2	3	1	2	3	1	2	1	4	3	4	5	5	5	4	5	3	4	3	3	3	3	1	2	3	1	3	1	1	2	2	2	2	2
528	3	2	2	4	4	3	4	2	2	3	2	3	3	3	2	3	4	2	2	2	2	2	4	4	3	2	2	3	2	2	2	3	4	4	4	3	2	4	3	4	3	2	5	5	5	5
529	5	4	5	5	3	1	1	1	1	1	1	3	4	3	5	5	5	3	5	5	2	3	2	1	1	2	1	2	2	3	2	2	3	3	5	5	4	3	5	4	4	5	4	4	3	5
530	1	3	2	2	1	3	1	1	2	3	1	2	1	3	2	1	2	1	2	2	3	5	4	3	3	4	3	3	4	3	3	4	5	3	1	1	2	2	3	2	2	3	2	2	2	2
531	4	3	3	2	2	4	3	3	3	2	4	2	2	3	4	4	4	4	3	3	2	4	3	2	4	3	4	3	3	2	4	2	3	3	2	4	3	2	3	3	3	2	4	2	4	4
532	3	4	4	4	2	1	1	1	1	1	1	2	2	3	4	4	4	4	4	4	4	2	3	4	2	4	3	2	4	4	2	4	3	4	4	4	2	2	3	2	3	2	4	2	2	3
533	4	3	4	3	4	4	4	3	4	4	4	4	4	4	3	4	4	3	3	4	2	2	2	3	2	4	3	2	4	4	3	2	2	2	2	3	4	3	2	4	2	3	2	3	2	4
534	3	3	3	4	4	1	1	1	1	1	1	4	3	4	3	4	3	5	5	5	3	3	2	2	2	2	1	2	1	3	3	3	1	2	3	3	5	4	4	5	3	5	3	4	3	4
535	3	4	3	3	4	2	4	2	4	2	2	4	2	3	4	1	1	1	1	1	2	4	3	4	3	4	4	2	4	4	4	2	4	2	4	4	3	2	3	3	4	2	3	2	2	2
536	4	4	2	2	2	3	3	4	2	2	3	3	4	2	4	2	4	4	2	3	2	2	4	3	2	2	3	4	3	3	2	3	3	2	4	3	3	4	3	4	4	3	4	3	4	4
537	4	3	3	3	3	5	5	5	5	5	5	5	4	3	5	5	4	5	3	3	2	1	1	2	2	2	2	3	2	2	1	2	2	2	3	5	5	4	4	3	4	3	3	5	5	4
